1 **The critical role of natural history museums in advancing eDNA for biodiversity studies: a**  
2 **case study with Amazonian fishes**

3  
4 C. David de Santana<sup>1\*</sup>, Lynne R. Parenti<sup>1</sup>, Casey B. Dillman<sup>2</sup>, Jonathan A. Coddington<sup>3</sup>, D. A.  
5 Bastos<sup>4</sup>, Carole C. Baldwin<sup>1</sup>, Jansen Zuanon<sup>5</sup>, Gislene Torrente-Vilara<sup>6</sup>, Raphaël Covain<sup>7</sup>,  
6 Naércio A. Menezes<sup>8</sup>, Aléssio Datovo<sup>8</sup>, T. Sado<sup>9</sup>, M. Miya<sup>9</sup>

7  
8 **1** Division of Fishes, Department of Vertebrate Zoology, MRC 159, National Museum of  
9 Natural History, PO Box 37012, Smithsonian Institution, Washington, DC 20013-7012, USA

10 **2** Cornell University Museum of Vertebrates, Department of Ecology and Evolutionary Biology,  
11 Cornell University, Ithaca, NY, 14850, USA

12 **3** Global Genome Initiative, National Museum of Natural History, PO Box 37012, Smithsonian  
13 Institution, Washington, DC 20013-7012, USA

14 **4** Programa de Pós-Graduação em Ciências Biológicas (BADPI), Instituto Nacional de  
15 Pesquisas da Amazônia, Manaus, Brazil

16 **5** Coordenação de Biodiversidade, Instituto Nacional de Pesquisas da Amazônia, Manaus,  
17 Amazonas, Brazil

18 **6** Instituto do Mar, Universidade Federal de São Paulo, Campus Baixada Santista, Santos, São  
19 Paulo, Brazil

20 **7** Muséum d'histoire naturelle, Département d'herpétologie et d'ichtyologie, route de Malagnou  
21 1, case postale 6434, CH-1211, Genève 6, Switzerland

22 **8** Museu de Zoologia da Universidade de São Paulo (MZUSP), Av. Nazaré, 481, 04263-000, São  
23 Paulo, SP, Brazil

24 **9** Natural History Museum and Institute, Chuo-ku, Chiba 260-8682, Japan

25  
26 \*Corresponding author

27 **Keywords:** Metabarcoding; Archives; Vouchers; Mitochondrial DNA; Reference libraries;  
28 Scientific collections; Outreach.

29  
30 **Short title:** Megadiversity of Amazonian Fishes from a Drop of Water

31 **ABSTRACT.** Ichthyological surveys have traditionally been conducted using whole-specimen,  
32 capture-based sampling with varied, but conventional fishing gear. Recently, environmental  
33 DNA (eDNA) metabarcoding has emerged as a complementary, and possible alternative,  
34 approach to whole-specimen methodologies. In the tropics, where much of the diversity remains  
35 undescribed, vast reaches continue unexplored, and anthropogenic activities are constant threats;  
36 there have been few eDNA attempts for ichthyological inventories. We tested the discriminatory  
37 power of eDNA using MiFish primers with existing public reference libraries and compared this  
38 with capture-based methods in two distinct ecosystems in the megadiverse Amazon basin. In our  
39 study, eDNA provided an accurate snapshot of the fishes at higher taxonomic levels and  
40 corroborated its effectiveness to detect specialized fish assemblages. Some flaws in fish  
41 metabarcoding studies are routine issues addressed in natural history museums. Thus, by  
42 expanding their archives to include eDNA and adopting a series of initiatives linking collection-  
43 based research, training and outreach, natural history museums can enable the effective use of  
44 eDNA to survey Earth's hotspots of biodiversity before taxa go extinct. Our project surveying  
45 poorly explored rivers and using DNA vouchered archives to build metabarcoding libraries for  
46 Neotropical fishes can serve as a model of this protocol.

47 **INTRODUCTION.** Historical ichthyological surveys in freshwater ecosystems globally were  
48 conducted with whole-specimen, capture-based sampling using conventional fishing methods  
49 such as gill nets, cast nets, hook and line, dipnets, seines, and rotenone – the last a chemical  
50 ichthyocide. Although the use of ichthyocides is considered advantageous in the tropics where  
51 unknown quantities of diversity remain to be described (e.g.,<sup>1</sup>), collecting fishes with rotenone  
52 has been banned as a sampling method in many regions due to its extraordinary power to kill  
53 fishes and associated fauna (e.g.,<sup>2</sup>). Capture-based methods other than rotenone are less  
54 powerful, especially for collecting small cryptobenthic species, and all capture-based methods  
55 may result in low capture rates in hard-to-sample environments, such as rapids, waterfalls, and  
56 deep-water reaches. Yet, by undersampling we increase the likelihood of overlooking, and in the  
57 sense of the biodiversity crisis globally missing, heretofore unaccounted-for species diversity.

58       Recently, DNA barcodes from environmental samples (eDNA), a non-invasive and  
59 quickly developing methodology that captures genetic material of multiple organisms, has  
60 emerged as a complementary, and a possible alternative approach, to repeated whole-specimen  
61 capture methods. Universal eDNA metabarcoding primers based on short variable DNA regions  
62 (typically ribosomal RNA – 12S rRNA, e.g.,<sup>3</sup>) were developed to detect multiple species of  
63 fishes through next-generation sequencing (NGS) of free DNA molecules that exist in nature  
64 (e.g., lost scales, excrement, and mucosal secretions in the water<sup>4,5,6</sup>).

65       The Amazon rainforest and basin maintain the most diverse riverine ichthyofauna on  
66 Earth, with more than 2,700 species classified in 18 orders and 60 families<sup>7,8</sup>. Such numbers are  
67 underestimates as many undescribed taxa await discovery and formal description<sup>9</sup>. The evolution  
68 of this fauna, one-fifth of the world's freshwater fishes<sup>10</sup>, dates to at least the upper Cretaceous  
69 and lower Cenozoic, ~ 120-150 million years before present (mybp<sup>11</sup>). The Characiphysae —  
70 catfishes (Siluriformes), piranhas and allies (Characiformes) and electric fishes  
71 (Gymnotiformes)— represent more than 75% of the fishes in Amazonian aquatic ecosystems<sup>7</sup>.  
72 That overwhelming fish diversity is also represented by, among other taxa, cichlids  
73 (Cichliformes), killifishes (Cyprinodontiformes), river stingrays (Myliobatiformes), pufferfishes  
74 (Tetraodontiformes), and silver croakers (Perciformes)<sup>7,12,13</sup>. Over time these fishes have  
75 diversified under a wildly varied set of environmental conditions to inhabit myriad aquatic

76 systems<sup>14</sup>. In contrast to the proposed ancient age of those lineages, most species-level  
77 diversification is hypothesized to have occurred relatively recently, less than 10 mybp (e.g.,<sup>13,15</sup>).

78 Accurate and thorough sampling is the critical first step towards a more complete  
79 knowledge of biodiversity, a path that also requires the proper identification of collected  
80 samples. Specimens of Amazonian fishes have been identified almost exclusively based on  
81 morphology, but given that molecular evolutionary rates can far outpace divergence in  
82 phenotypes, recent studies that integrate molecular and morphological data have greatly  
83 improved our understanding of species diversity, including that of fishes<sup>15,16</sup>. DNA barcoding –  
84 which typically uses the mitochondrial COI (Cytochrome Oxidase subunit I) gene to identify  
85 candidate species<sup>17</sup> – is now a common molecular method used in taxonomic studies of fishes  
86 and has been valuable in revealing cryptic species diversity and in helping to resolve complex  
87 taxonomic issues<sup>15,18,19</sup>.

88 Accordingly, the demand for samples appropriate for DNA barcoding, i.e., properly  
89 preserved and vouchered in ichthyological collections by the scientific community, has increased  
90 significantly. This demand is correlated directly with efforts to collect DNA-worthy samples  
91 during biodiversity surveys along with museum vouchers and has become a common practice  
92 among scientists worldwide<sup>20,21,22</sup>. Concomitant with sampling and curating efforts, new public  
93 platforms have been created to help close gaps in shared sample information (e.g., Global  
94 Genome Biodiversity Network<sup>23</sup>) and facilitate access to the sequences (e.g., BOLD). In contrast  
95 to this trend, historically few efforts to collect a substantial number of tissue samples during  
96 ichthyological surveys – possibly because of the lack of infrastructure to maintain such a  
97 collection – results in a lack of robust reference libraries for Amazonian fishes (e.g.,<sup>24</sup>). In  
98 addition, although Genbank often is a reliable resource<sup>25</sup>, several samples of Amazonian fishes  
99 are poorly identified in GenBank, and some lack properly preserved voucher specimens – a  
100 problem that extends to other fishes as well (e.g.,<sup>26,27</sup>).

101 Most metabarcoding inventories of freshwater fishes have been conducted in temperate  
102 habitats with well-characterized species diversity<sup>28</sup>. There have been only a few attempts to use  
103 eDNA metabarcoding in ichthyological surveys in the Neotropical region<sup>29,30,31,32</sup>, an area where  
104 understanding species-level diversity is more complex. For example,<sup>30</sup> built 12S eDNA

105 metabarcoding primers based on a reference library for over 130 species known to occur in the  
106 rivers and streams of the French Guiana, and the eDNA results were compared with capture-  
107 based sampling methodologies. They recovered a similar number of species, with a partial match  
108 to species identification, using both capture-based and eDNA approaches. Conversely,<sup>32</sup> used  
109 MiFish primers<sup>3</sup> in three localities in the central Amazon and suggested that a new approach  
110 would be necessary to evaluate the Neotropical fish fauna using eDNA metabarcoding.

111 Despite the problems inherent in the development of new methodologies, eDNA  
112 technology and bioinformatics is evolving at accelerated rates and will soon play a central role in  
113 the inventory of fish diversity<sup>6,33,28,34</sup>. Freshwater aquatic ecosystems, many of which are poorly  
114 explored, are under severe and fast-pacing threat due to anthropogenic activities<sup>35</sup>. Thus, the next  
115 decade or so will be pivotal to survey these habitats to secure vouchers, DNA, and eDNA  
116 samples to build reference libraries and archive the samples as well as to engage society in  
117 protection and preservation as these environments reach their tipping point. Natural history  
118 museums are the sound common ground where key flaws and gaps in those two inversely  
119 proportional trends can be addressed and filled. Here, we tested the discriminatory power of the  
120 MiFish primers using the existing public reference libraries by surveying two distinct  
121 ecosystems, river and stream, during a scientific expedition to the heretofore largely unexplored  
122 Javari River basin in Brazil-Peru-Colombia border. The results of eDNA analysis were compared  
123 with the capture-based methodology and are discussed in the context of the critical role of  
124 natural history museums in the development of eDNA metabarcoding as a tool for biodiversity  
125 studies.

126

## 127 **Results**

### 128 **1. Ichthyological survey – Capture-based sampling (CBS)**

129 In total, 443 species classified in 236 genera, 49 families, and 15 orders were collected  
130 using traditional methods from 46 stations in multiple environments during the Javari River  
131 expedition (Table S1). Among these collections are over 60 species that are new to science.

132 More specifically, in the three stations sampled using traditional and eDNA  
133 methodologies (Figure 1), we collected the following: 145 species, 101 genera, 32 families and

134 nine orders in the main Javari River (station 1); 56 species, 38 genera, 21 families, and six orders  
135 in a stream (station 2); and 67 species, 58 genera, 27 families, and seven orders in the Quixito  
136 River (station 3; Table S1).

137

### 138 **eDNA data analyses and assessment of taxonomic resolution of public reference**

139 **database (Molecular-based Sampling -- MBS)** A total of 1,903,160 reads was assigned to the  
140 11 libraries (station 1 = 5 libraries; station 2 = 5 libraries; station 3 = 1 library), and the number  
141 of raw reads for each library ranged from 135,818 to 213,952 with an average of 173,015 reads  
142 (Table S2). The final reference database with 1,671,871 fish reads (99.7% of the denoised reads)  
143 yielded 222 MOTUs assigned to 104 genera, 41 families, and 9 orders of fishes (Figure 2 and  
144 Tables S3, S4).

145 Matching sequences identity of >98.5% for 58 species (26%) of 222 species detected by  
146 eDNA were found in the reference library database (Table 1). It represented 36.3% of  
147 Siluriformes; 27.1% of Characiformes; 11.7% of Cichliformes; and 10.8% of Gymnotiformes in  
148 the most species-rich orders detected by eDNA. From these, six species (10.3%) were identified  
149 as “sp.” in reference libraries. Only 17 species (7.6%) were also identified in the CBS (Table 1).

150

### 151 **2. Species composition among eDNA samples: distinguishing between river versus** 152 **stream-dwelling communities**

153 Six eDNA samples were collected in the river (stations 1 and 3) and five in the stream  
154 (station 2), and a clear split is seen between these two fish communities (Figure 3). The number  
155 of species detected per sample ranged from 33 to 87 (for details see Supp information) with an  
156 abrupt differentiation between species composition in the stream (samples 1-5) and river samples  
157 (samples 6-11), as detected by the Pearson correlation coefficients (Figure 3A). That is, stream  
158 and river-dwelling communities are clearly distinct on the species composition Habitat axis.  
159 Pearson coefficients are varying from 0.5 to 1.0 in stream versus 0.0 to -0.5 in river. Thus,  
160 species composition is more similar within each community, except for a clear distinction  
161 between the river assemblages at Javari (samples 6-10) and Quixito Rivers (sample 11).

162 To assess whether the difference in species composition between stream and river  
163 communities observed in the Pearson correlation coefficients were significant, we calculated  
164 Jaccard's dissimilarities indices through a NMDS analysis. The original position of the 222  
165 detected species in river, stream, and in both habitats were represented in a three-dimensional  
166 NMDS space (Figure 3B). The Stress = 0.0524 of the NMDS plot indicated that its first three  
167 axes provided an appropriate three-dimensional representation of the habitats according to their  
168 species composition<sup>36</sup>, and NMDS significantly distinguished between the river and stream  
169 communities (ANOSIM R = 0.4327;  $p < 0.0001$ ; Figure 3B).

170 Based on the species frequency detected per order we determined the composition of the  
171 stream and river habitats (Figures 3B and C). Of note is the difference in the species composition  
172 between the five samples from Javari River (Samples 1 to 5) and the single sample (Sample 6)  
173 collected in the Quixito River (Figures 3A and D). The interrelationships between habitat and  
174 species diversity and composition per order are represented in the chord diagram in Figure 3E.

175

### 176 **3. Comparing Capture-based sampling (CBS) and Molecular-based sampling (MBS) –** 177 **eDNA metabarcoding species richness**

178 **4.1. Javari River (station 1).** CBS captured a total of 145 species, 101 genera, 32 families and  
179 nine orders in the main Javari River. Conversely, MBS found 107 species, 28 genera, 20  
180 families, and seven orders (Figure 4A, B; Tables S5, S6). Thirteen species were detected by both  
181 CBS and MBS (Table 1). The rarefaction sampling curve illustrating the accumulation of unique  
182 species with the number of individuals collected by CBS does not reach an asymptote (Figure  
183 4C), indicating that several species remain to be detected. This is also corroborated by the Chao  
184 II species richness bias-corrected estimator for MBS, which predicated 216 species (95%  
185 confidence interval: 163–318).

186 **4.2. Stream (station 2).** CBS caught 56 species, 38 genera, 21 families, and 6 orders. In contrast,  
187 in the stream, MBS detected 126 species, 22 genera, 17 families and 4 orders (Figure 4D, E;  
188 Tables S7, S8). Six species were detected by both methodologies (Table 1). The rarefaction  
189 curve for CBS extrapolates to slightly over 60 species the diversity in the stream (Figure 4F).

190 Conversely, MBS Chao II bias- corrected estimator calculated 145 species in the stream (95%  
191 confidence interval: 134–172).

192

## 193 **Discussion**

### 194 **1. Can eDNA provide an accurate snapshot of the Amazonian megadiverse freshwater** 195 **ichthyofauna considering current public reference libraries for 12s rRNA?**

196 The Javari River basin contains a considerable fraction of Amazonian fish diversity, ca. 15% of  
197 species, 37% of genera, 60% of families, and 83%. It is, therefore, an excellent testing ground for  
198 eDNA metabarcoding effectiveness for the Amazonian fish fauna. Based on the current public  
199 reference libraries, i.e., Genbank and MiFish DB, MBS provided an accurate snapshot of the  
200 Amazonian megadiverse freshwater ichthyofauna at the Javari River basin when we consider  
201 higher taxonomic levels, i.e., order.

202 The detection of 222 species in 11 samples from three stations confirms that eDNA is  
203 highly sensitive. However, the low number (28%) of matching sequences with identity of  
204 >98.5% in the public reference libraries suggests severe gaps in the library for Amazonian fishes.  
205 It corroborates a recent global gap analysis of reference databases<sup>24</sup>, which revealed that 13% of  
206 the over 33,000 known teleostean fish species are sequenced for 12S, representing 38% of  
207 genera, 80% of families and 98.5% of orders. For freshwater fishes, among all continents, South  
208 America and Africa had by far the lowest coverage. Not surprisingly, we found the lowest eDNA  
209 identification match at the species level.

210 Conversely, studies that built reference libraries for highly diverse fish communities  
211 considerably improved the match ratio to species identification between capture-based and  
212 eDNA approaches.<sup>30</sup>, for example, identified 65% of 203 species of Guianese fishes. Likewise,  
213<sup>37</sup> detected and correctly assigned all 67 species with 12S previously designed primers and  
214 reference library in the São Francisco River, Brazil. In contrast,<sup>32</sup> assigned only 4 of 84 MOTUs  
215 to species, demonstrating problems on the taxonomic resolution in the target gene and general  
216 threshold used for species assignment.

217 The DNA barcoding and eDNA metabarcoding both rely on short, variable, standardized  
218 DNA regions, which can be amplified by PCR, sequenced, and analyzed to identify taxa. The



219 eDNA approach for vertebrates does not efficiently employ the COI gene because interspecific  
220 genetic variation prevents the use of universal primers<sup>38</sup> and can result in non-specific  
221 amplifications (<sup>39</sup>; but see, <sup>40</sup>). Instead, rRNA genes used in DNA metabarcoding, such as 12S  
222 rRNA (e.g.,<sup>3</sup>), have the acceptable resolution at the species level and an elevated copy number  
223 per cell due to the number of mitochondria per cell. Similarly, rRNA genes are preferable over  
224 single-copy nuclear DNA, which is less likely to be detected in the environment. Yet, the low  
225 substitution rate of rRNA genes will compromise the identification of rapidly evolved and  
226 complex fish assemblages such as those in the Neotropical region. Thus, it is likely that, in the  
227 near future, DNA barcode and eDNA metabarcode methods will converge to use large portions  
228 of the mitochondrial genome. Regardless of the fragment or the threshold used to delimit species  
229 (e.g.,<sup>32</sup>), it is essential that studies involving eDNA for assessing fish diversity move towards  
230 building robust mitochondrial DNA reference libraries based on vouchered specimens.

231

## 232 **2. eDNA species detection across heterogeneous aquatic environments**

233 Amazonian aquatic environments are characterized by specialized fish communities  
234 segregated across a variety of habitats, such as streams, rivers, and their microhabitats<sup>14,41</sup>. In  
235 streams, diverse microhabitats are home to leaf-dwelling, sand-dwelling, and pool-dwelling fish  
236 communities<sup>42,43,44</sup>. Similarly, rivers have specialized fish groups living in high-energy or deep  
237 water (>5 meters) environments. It is critical that fishes inhabiting all aquatic environments are  
238 sampled in biodiversity inventories. Perhaps unsurprisingly, it is incredibly difficult to sample  
239 and therefore assess some microhabitats by CBS. For example, some species are buried deep in  
240 the roots of plants in the riparian zone (e.g.,<sup>45</sup>), leaf litter, or in the sand of streams that are  
241 extremely difficult to collect with traditional sampling gear. These life history strategies  
242 naturally underestimate the number of fish species living in these areas due to microhabitat  
243 partitioning and undescribed diversity. We corroborate the potential effectiveness of MBS to  
244 detect specialized fish assemblages across heterogeneous aquatic environments. More intensive  
245 sampling efforts might be required to detect low-occurrence taxa as well as to appropriately  
246 sample microhabitats, e.g., filtering a higher amount of water or collecting water from temporary  
247 pools and the river bottom.

248 **2.1. River.** In the Javari River (station 1), seven orders were detected by CBS and MBS  
249 (Characiformes, Cichliformes, Clupeiformes, Gymnotiformes, Perciformes, Pleuronectiformes,  
250 Siluriformes). In addition, CBS detected Beloniformes and Myliobatiformes; and MBS found  
251 Osteoglossiformes. The absence of Beloniformes and Myliobatiformes in the MBS could be due  
252 to the poor reference library for comparisons. In contrast, Osteoglossiformes (*Arapaima gigas*) is  
253 well known to occur in the region and specimens were found in the local market. Thus, the  
254 absence of *Arapaima* in the CBS was circumstantial.

255 The difference in species composition between the two methodologies that was detected  
256 possibly is due to sampling bias in MBS. Water samples for MBS were only collected at the river  
257 surface, detecting mostly free DNA of fish assemblages occurring at midwater and near the  
258 surface, where species-diverse Characiformes are the dominant assemblage. Despite that, as  
259 aforementioned, MBS was also able to take a snapshot of the benthic fish fauna by detecting  
260 many catfish species typically restricted to river channels (e.g.,<sup>46,47</sup>). For example, MBS detected  
261 river-dwelling fishes living near the surface, as well as some deep-water (> 5m depth)  
262 inhabitants e.g., *Brachyplatystoma* spp. – goliath catfishes; Pleuronectiformes – flatfishes; and a  
263 large number of unidentified species of electric fishes (sequences identities within the range of  
264 80–98.5%) belonging to the families Apterontidae (10 species) and Sternopygidae (15 species)  
265 – common, but often underestimated components of rivers (e.g.,<sup>48,49,50</sup>).

266 In addition, the sole sample collected in the mouth of the Quixito River (station 3) was  
267 substantially different from the five samples collected in the Javari River reflecting the different  
268 milieu where the samples were collected. The Javari samples were dominated by Characiformes  
269 whereas Gymnotiformes dominated in the Quixito River sample. In the Javari River, samples  
270 were collected in fast-flowing water along the edge between a shallow peat bog and the main  
271 channel. The Quixito River sample was collected at the mouth of the river, characterized by  
272 small slow-flowing channel.

273 **2.2. Stream.** Typically, Characiformes, Siluriformes, Gymnotiformes, Cichliformes,  
274 Cyprinodontiformes, Beloniformes, and Synbranchiformes are the dominant orders in  
275 Amazonian streams (e.g.,<sup>51</sup>). At station 2, both approaches detected species belonging to  
276 Characiformes, Siluriformes, Gymnotiformes, and Cichliformes. In addition, CBS found

277 Beloniformes and Cyprinodontiformes whereas MBS detected Synbranchiformes for a total of  
278 seven orders. The absence of Beloniformes in the MBS may be due to the poor reference library  
279 for comparisons, and the absence of Synbranchiformes in the CBS here could be due to the  
280 difficulty in collecting cryptobiotic species. We were able to detect at a fine-scale specialized  
281 species assemblage restricted to microhabitats. For example, we captured members of the leaf-  
282 dwelling (e.g., *Apistogramma* spp. – dwarf cichlids) and sand-dwelling (e.g.,  
283 *Gymnorhamphichthys* spp. – sand knifefishes) fish communities. It remains to be determined  
284 whether eDNA failed to detect fishes that are residents in the temporary pools (e.g., killifishes –  
285 Rivulidae) because of the limitation of its radius of action, or due to the poor reference library for  
286 Neotropical fishes.

287 Species diversity in Amazonian Terra firme streams ranges from ca. 30 to 170 species<sup>52</sup>  
288 with Characiformes and Siluriformes being the most species-rich orders (e.g.,<sup>53</sup>). Quantification  
289 of fish richness in these streams depends upon the sampling methodology employed and its  
290 substrate composition (for reviews see<sup>54,55,56</sup>). For example, in litter banks-rich streams,  
291 Gymnotiformes species diversity can surpass Siluriformes (e.g.,<sup>57</sup>). In station 2, according to  
292 CBS, Characiformes and Siluriformes were the dominant orders. In contrast, Characiformes  
293 followed by Gymnotiformes were the more species-diverse groups. The extremely high number  
294 of species detected by MBS in the sampled stream, more than twice that of CBS, primarily in the  
295 two dominant orders, Characiformes and Gymnotiformes, is likely related to four different  
296 issues. First, MBS was collected near the confluence between the river and stream, which may  
297 have resulted in occasional, wandering river fishes. Second, the CBS was conducted with a  
298 standardized sampling effort in a restrict (50-m) stretch of the stream (e.g.,<sup>55</sup>), not including its  
299 headwaters and areas near its mouth. Third, Characiformes undoubtedly contain hidden species  
300 diversity. This is corroborated by the historical difficulty in identification of small tetra species,  
301 wherein one named species may represent several undescribed species, such as in *Astyanax*  
302 (e.g.,<sup>58,59</sup>). Fourth, diversity is also underestimated for the Gymnotiformes (e.g.,<sup>60</sup>), for which  
303 difficulties in capturing species with cryptobiotic habits possibly play a critical role in the  
304 underestimation of their diversity by CBS methods (sub-estimative may reach three times the  
305 local species richness and up to 10 times the specimens abundance; JZ, unpublished data).

306

### 307 **3. The role of natural history museums in the advance of eDNA studies**

308 The biodiversity crisis is one of the grand challenges of the 21st century<sup>61,62</sup> with the next two  
309 decades critical for the conservation of freshwater environments. Freshwater ecosystems  
310 worldwide hold ca. 30% of vertebrate diversity, including ca. 50% of all fish species diversity,  
311 and are one of the most vulnerable environments on Earth<sup>35,62,63,64,65</sup>.

312 Combining specimens, DNA sampling and taxonomic identification is required to obtain  
313 a comprehensive assessment of biodiversity. Yet, DNA samples are available for less than 10%  
314 of the specimens deposited in most fish repositories. Since most fish specimens deposited in  
315 museums and other repositories were collected before the development of PCR, a vast majority  
316 were fixed in formalin, a standard method of fixation for over a century. Despite the advances in  
317 the techniques of DNA extraction from formalin-fixed materials, the success of these techniques  
318 is still limited, especially for specimens stored for long periods in unbuffered solutions<sup>66,67,68</sup>.

319 Thus, well-identified vouchered DNA tissue samples are critical for the identification of  
320 unknown DNA in environmental samples. These DNA tissues may be stored as dried, frozen, or  
321 alcohol-fixed samples or as cryopreserved living samples that have broad potential applications  
322 (e.g.,<sup>69</sup>). However, scientific collections in regions holding most of the fish diversity, such as the  
323 Neotropics, often lack the ideal infrastructure to hold long-term genetic resources (e.g.  
324 ultrafreezers, liquid nitrogen storage, cryo-facilities). Nevertheless, GGBN has targeted and  
325 sometimes funded Neotropical institutions to build biorepository capacity and to make their  
326 collections globally discoverable.

327 These limitations are particularly worrisome given the stark reality of anthropogenic  
328 destruction, climate change and the great extent of predicted unknown diversity that remains to  
329 be described in the Amazon rainforest<sup>70,71</sup>. These factors make this area and Earth's other  
330 hotspots of biodiversity priority targets for complete species inventories in the next decade  
331 before suffering irreversible damage (e.g.,<sup>72</sup>). Another advantage of eDNA is the long-term  
332 biodiversity monitoring in preserved areas/conservation units (e.g.,<sup>73</sup>). The use of eDNA is a  
333 highly valuable and cost-effective way to monitor biodiversity, especially in areas with low

334 anthropogenic threats<sup>74</sup>. This would allow a better prioritization of scarce resources for research  
335 and/or conservation actions.

336           In the face of these challenges, natural history museums should play a primary role in the  
337 development of eDNA as a tool of biodiversity inventories as well as to track changes in  
338 biodiversity hotspots by: (1) prioritizing expeditions to jointly secure DNA samples, vouchers,  
339 and eDNA in Earth’s hotspots of biodiversity; (2) adapting their biorepositories to archive eDNA  
340 samples, which as a consequence, would provide samples not only for analysis with current but  
341 heretofore unseen technologies; (3) creating reference libraries for the mitochondrial genome; (4)  
342 backing up DNA samples with species-level accuracy on the identification of vouchered  
343 specimens; (5) expanding and improving their tissue biobanks. It is crucial that these  
344 modifications for eDNA storage also occur in museums in Neotropical and Afrotropical  
345 countries, which host most of freshwater fish diversity yet lack the resources to build and  
346 maintain these tissue collections in perpetuity<sup>75,76,77</sup>. These efforts would maximize the  
347 information extracted from eDNA metabarcoding and DNA samples, facilitate the design of sets  
348 of universal primers for broader biodiversity inventories, monitor hotspots of biodiversity, and  
349 support taxon-specific surveys; (6) improving public platforms to close gaps in sampling  
350 information and making possible access to DNA sequences; (7) training students and researchers  
351 to use CBS, MBS, morphology and molecular-based taxonomy to survey and identify  
352 biodiversity. By combining eDNA with tissues associated with museum-curated voucher  
353 specimens we can continue to fill gaps currently missing in our knowledge of biodiversity. The  
354 high frequency of our lowest taxonomic identifications ending with “sp.,” species undetermined,  
355 when assessing species diversity using a new technology highlights the need for highly trained  
356 taxonomic specialists. Finally, (8) using eDNA research as a gateway to inspire and engage  
357 society in natural history and the race against time to survey and protect Earth’s hotspots of  
358 biodiversity through education and citizen science programs. Considering the simplicity of  
359 implementing MBS in certain aquatic environments, such as rivers (see Methods), scientific  
360 communities at natural history museums can launch regional/ global outreach and human  
361 resource training initiatives involving citizen scientists, K-12 students, and professional  
362 scientists. Likewise, it would create niches for large-scale natural history museums to work with

363 regional-scale scientific institutions worldwide, such as in the training of human resources (e.g.,  
364 technicians to curate genetic resources) and promoting horizontal transfer of technology in South  
365 America and Africa (e.g., eDNA methodology). In sum, activities involving eDNA have the  
366 potential to fulfill the priorities of natural history museums in the 21st century: research,  
367 collections, training, and outreach.

368         One successful initiative is the DNA barcoding and metabarcoding libraries for  
369 Amazonian fishes supported by Smithsonian's Global Genome Initiative (GGI), DNA Barcode  
370 Alliance, and São Paulo Research Foundation (FAPESP). The current project is the first of many  
371 scientific expeditions planned over the next three years to survey fishes in poorly explored areas  
372 of the Amazon basin supported by these three initiatives. DNA and eDNA samples and vouchers  
373 are being used to develop a robust, well-documented, mitochondrial DNA reference database.  
374 This eDNA database is validated by morphological (phenotypic) vouchers. Additional eDNA  
375 samples have been collected and deposited in the Smithsonian Institution's National Museum of  
376 Natural History Biorepository. We aim to make available an online platform of DNA sequences  
377 of all orders and families, most of the genera, and a significant number of species of Amazonian  
378 fishes. Likewise, GGI is also supporting an initiative for African freshwater fishes. These actions  
379 together with the ongoing development of eDNA technology and bioinformatics will enable the  
380 use of eDNA metabarcoding in fish inventories and the more effective monitoring of hotspots of  
381 biodiversity worldwide.

382

### 383 **Acknowledgements**

384 The expedition to the Javari River was funded by São Paulo State Research Foundation grant to  
385 GTV (FAPESP #2016/07910-0) and Global Genome Initiative grant to CDS, CBD, and LRP  
386 (GGI-Peer-2017-149). A Global Genome Initiative grant to CDS to survey African rivers and  
387 build DNA barcoding and metabarcoding archives for freshwater fishes (GGI-Peer-2020-258).  
388 JZ received a productivity grant from Brazil's CNPq (#313183/2014-7). AD, CDS, and NAM are  
389 funded by FAPESP (#2016/19075-9). MM and TS were supported by Environment Research and  
390 Technology Development Fund (4-1602) of the Ministry of the Environment, Japan.

391

392 **AUTHOR CONTRIBUTION**

393 The study was conceived by CDS and designed by CDS and MM. Environmental samples were  
394 collected by CDS, DAB, JZ, GTV. MM and TS performed laboratory analyses. Bioinformatic  
395 and statistical analyses were performed by CDS and MM. The manuscript was written by CDS.  
396 with input from all the authors. CDS coordinated the study.

397

398 **DATA AVAILABILITY**

399 Data will be made public on the DRYAD repository upon acceptance.

400

401 **METHODS**

402 **Study area.** The Javari River encompass an area of 109.202 km<sup>2</sup> with a 1180 km of a main white  
403 water river channel (*sensu* Sioli, 1967; i.e., pH-neutral low-transparency, alluvial sediment-laden  
404 tributary of the Amazon River forming the border between Brazil, Peru and Colombia for ca. 800  
405 km. The first formal records for the Javari river basin were obtained during the Thayer  
406 Expedition to Brazil, in 1865. Most of region remained largely unexplored until our survey  
407 conducted along the Javari River basin during the low water season in July-August of 2017.

408

409 **Specimens sampling and identification.** All samples were collected under Jansen Zuanon  
410 permanent permit (SISBIO # 10199-3). Capture-based specimens were sampled at 46 localities  
411 along the Javari River basin (Figure 1) during the low water season in July-August, 2017, using  
412 gill nets, cast nets, hand nets, and trawl nets in rivers, rapids, beaches, streams, and lakes (Table  
413 S1). All fish specimens collected were identified to species level and deposited at the Instituto  
414 Nacional de Pesquisas da Amazônia (INPA) under the numbers INPA-ICT 055148 to INPA-ICT  
415 057159, in Brazil.

416

417 **Water sampling sites and on-site filtration.** Eleven water samples were collected from water  
418 surface at three stations to represent the Javari fish fauna: Station 1, Figure 1; JAV2017081606  
419 (5 samples) – Javari River, below Limoeiro (-4.176, -70.779); Station 2, Figure 1;  
420 JAV2017082108 (5 samples) – “Terra firme” clearwater stream (locally named as “igarapés”),

421 i.e., acid, highly-transparent and shallow (depth <2 meters), Palmari community (-4.293, -  
422 70.291); and Station 3, QUI 2017082906 (1 Sample) – Quixito River (-4.428, -70.260). We used  
423 low-tech bucket-sampling to collect freshwater using a 10L polypropylene bucket fastened to a 5  
424 m rope (nylon rope, 6 mm in diameter) to collect 5L of water. Before the water sampling, we  
425 wore disposable gloves on both hands and assembled two sets of on-site filtration kits consisting  
426 of a Sterivex filter cartridge (pore size 0.45  $\mu\text{m}$ ; Merck Millipore, MA, USA) and a 50 mL  
427 disposable syringe. Then we thoroughly decontaminated the bucket with a foam-style 10%  
428 bleach solution and brought the equipment to the sampling point. We fastened one end of the 5 m  
429 rope to the bucket and collected surface freshwater by tossing and retrieving it. We repeated  
430 collection of fresh water three times to minimize sampling biases at each station.

431 We performed on-site filtration using two pairs of the filtration kits described above  
432 (filter cartridge + syringe) to obtain duplicate samples. With each collection of fresh water, we  
433 removed the filter cartridge from the syringe, drew approximately 50 ml freshwater into the  
434 syringe by pulling the plunger, reattached the filter cartridge to the syringe, and pushed the  
435 plunger to filter the water. We repeated this step twice in each toss of the bucket sampling so that  
436 the final filtration volume reached 100 ml  $\times$  2 with three tosses of the bucket. When the filter  
437 was clogged before reaching 100-ml filtration, we recorded the total volume of water filtered  
438 (70–100 mL from three stations).

439 After on-site filtration, we sealed an outlet port of the filter cartridge with Parafilm (Bemis  
440 NA, Wisconsin, USA), added 2 ml of RNAlater (Thermo Fisher Scientific, DE, USA) into the  
441 cartridge from an inlet port of the cartridge using a disposable capillary pipette (Kinglete, USA)  
442 to prevent eDNA degradation, and then sealed the inlet port either with Parafilm or a cap for  
443 preservation. Filtered cartridges filled with RNAlater were kept in  $-20^{\circ}\text{C}$  freezers until shipment  
444 to MM's lab at Natural History Museum and Institute, Chiba, Japan. Samples shipped under  
445 export for biological material permit at room temperature using an overseas courier service.

446  
447 **DNA extraction.** All DNA experiments were conducted in MM's lab. We sterilized the  
448 workspace and all equipment before DNA extraction. We used filtered pipette tips and conducted



449 all eDNA-extractions and manipulations in a dedicated room that is physically separated from  
450 pre- and post-PCR rooms to safeguard against cross-contamination from PCR products.

451 We extracted eDNA from the filter cartridges using a DNeasy Blood & Tissue kit  
452 (Qiagen, Hilden, Germany) following the methods developed and visualized by <sup>78</sup> with slight  
453 modifications.

454 We connected an inlet port of each filter cartridge with a 2.0-ml collection tube and  
455 tightly sealed the connection between the cartridge and collection tube with Parafilm. We  
456 inserted the combined unit into a 15-ml conical tube and centrifuged the capped conical tube at  
457 6,000xg for 1 min to remove freshwater and RNAlater. After centrifugation we discarded the  
458 collection tube and used an aspirator (QIAvac 24 Plus, Qiagen, Hilden, Germany) to completely  
459 remove liquid remaining in the cartridge.

460 We subjected the filter cartridge to lysis using proteinase K. Before the lysis, we mixed  
461 PBS (220 µl), proteinase K (20 µl) and buffer AL (200 µl), and gently pipetted the mixed  
462 solution into the cartridge from an inlet port of the filter cartridge. We again sealed the inlet port  
463 and then placed the cartridge in a 56°C preheated incubator for 20 min while stirring the  
464 cartridge using a rotator (Mini Rotator ACR-100, AS ONE, Tokyo, Japan) with a rate of 10 rpm.  
465 After the incubation, we removed the film from the inlet port and connected the port with a 2-ml  
466 tube (DNA LowBind tube, SARSTEDT, Tokyo, Japan) for DNA collection. We placed the  
467 combined unit in a 50-ml conical tube and centrifuged the capped tube at 6,000xg for 1 min to  
468 collect the DNA extract.

469 We purified the collected DNA extract (*ca.* 900 µl) using the DNeasy Blood and Tissue  
470 kit following the manufacture's protocol with a final elution volume of 200 µl. We completed  
471 DNA extraction in one round and used one more premix for the extraction blank (EB) to monitor  
472 contamination. All DNA extracts were frozen at -20°C until paired-end library preparation.

473  
474 **Paired-end library preparation and sequencing.** We sterilized the workspace and equipment  
475 in the pre-PCR area before library preparation. We used filtered pipette tips and performed pre-  
476 and post-PCR manipulations in two different, dedicated rooms to safeguard against cross  
477 contamination.

478 We employed a two-step PCR for paired-end library preparation on the MiSeq platform  
479 (Illumina, CA, USA) and generally followed the methods developed by<sup>3</sup>. For the first-round  
480 PCR (1st PCR), we used a mixture of the following four primers: MiFish-U-forward (5′-ACA  
481 CTC TTT CCC TAC ACG ACG CTC TTC CGA TCT NNN NNN GTC GGT AAA ACT CGT  
482 GCC AGC-3′), MiFish-U-reverse (5′-GTG ACT GGA GTT CAG ACG TGT GCT CTT CCG  
483 ATC TNN NNN NCA TAG TGG GGT ATC TAA TCC CAG TTT G-3′), MiFish-E-forward-v2  
484 (5′-ACA CTC TTT CCC TAC ACG ACG CTC TTC CGA TCT NNN NNN RGT TGG TAA  
485 ATC TCG TGC CAG C-3′) and MiFish-E-reverse-v2 (5′-GTG ACT GGA GTT CAG ACG  
486 TGT GCT CTT CCG ATC TNN NNN NGC ATA GTG GGG TAT CTA ATC CTA GTT TG-  
487 3′). These primer pairs amplify a hypervariable region of the mitochondrial 12S rRNA gene (*ca.*  
488 172 bp; hereafter called “MiFish sequence”) and append primer-binding sites (5′ ends of the  
489 sequences before six Ns) for sequencing at both ends of the amplicon. We used the six random  
490 bases (Ns) in the middle of those primer to enhance cluster separation on the flow cells during  
491 initial base call calibrations on the MiSeq platform.

492 We carried out the 1st PCR with 35 cycles in a 12- $\mu$ l reaction volume containing 6.0- $\mu$ l  
493 2  $\times$  KAPA HiFi HotStart ReadyMix (KAPA Biosystems, MA, USA), 2.8  $\mu$ l of a mixture of the  
494 four MiFish primers in an equal volume (U/E forward and reverse primers; 5  $\mu$ M), 1.2- $\mu$ l sterile  
495 distilled H<sub>2</sub>O and 2.0- $\mu$ l eDNA template (a mixture of the duplicated eDNA extracts in an equal  
496 volume). To minimize PCR dropouts during the 1st PCR, we performed 8 replications for the  
497 same eDNA template using a strip of 8 tubes (0.2  $\mu$ l). The thermal cycle profile after an initial 3  
498 min denaturation at 95°C was as follows: denaturation at 98°C for 20 sec, annealing at 65°C for  
499 15 sec and extension at 72°C for 15 sec with the final extension at the same temperature for 5  
500 min. We also made a 1st PCR blank (1B) during this process in addition to EB. Note that we did  
501 not perform 8 replications and used a single tube for each of the two blanks (EB, 1B) to  
502 minimize cost of the experiments.

503 After completion of the 1st PCR, we pooled an equal volume of the PCR products from  
504 the 8 replications in a single 1.5-ml tube and purified the pooled products using a GeneRead Size  
505 Selection kit (Qiagen, Hilden, Germany) following the manufacturer’s protocol for the  
506 GeneRead DNA Library Prep I Kit. This protocol repeats the column purification twice to

507 completely remove adapter dimers and monomers. Subsequently we quantified the purified  
508 target products (ca. 172 bp) using TapeStation 2200 (Agilent Technologies, Tokyo, Japan),  
509 diluted it to 0.1 ng/ $\mu$ l using Milli Q water and used the diluted products as templates for the  
510 second-round PCR (2nd PCR). For the two blanks (EB, 1B), we purified the 1st PCR products in  
511 the same manner, but did not quantify the purified PCR products, diluted them with an average  
512 dilution ratio for the positive samples, and used the diluted products as templates for the 2nd  
513 PCR.

514 For the 2nd PCR, we used the following two primers to append dual-index sequences (8  
515 nucleotides indicated by Xs) and flowcell-binding sites for the MiSeq platform (5' ends of the  
516 sequences before eight Xs): 2nd-PCR-forward (5'-AAT GAT ACG GCG ACC ACC GAG ATC  
517 TAC ACX XXX XXX XAC ACT CTT TCC CTA CAC GAC GCT CTT CCG ATC T-3'); and  
518 2nd-PCR-reverse (5'-CAA GCA GAA GAC GGC ATA CGA GAT XXX XXX XXG TGA  
519 CTG GAG TTC AGA CGT GTG CTC TTC CGA TCT-3').

520 We carried out the 2nd PCR with 10 cycles of a 15- $\mu$ l reaction volume containing 7.5- $\mu$ l  
521 2  $\times$  KAPA HiFi HotStart ReadyMix, 0.9- $\mu$ l each primer (5  $\mu$ M), 3.9- $\mu$ l sterile distilled H<sub>2</sub>O and  
522 1.9- $\mu$ l template (0.1 ng/ $\mu$ l with the exceptions of the three blanks). The thermal cycle profile  
523 after an initial 3 min denaturation at 95°C was as follows: denaturation at 98°C for 20 sec,  
524 annealing and extension combined at 72°C (shuttle PCR) for 15 sec with the final extension at  
525 the same temperature for 5 min. We also made a 2nd PCR blank (2B) during this process in  
526 addition to EB and 1B.

527 To monitor for contamination during the DNA extraction, 1st and 2nd PCRs of the 11  
528 samples, we made a total of 3 blanks (EB, 1B, 2B) and subjected them to the above library  
529 preparation procedure.

530 We pooled each individual library in an equal volume into a 1.5-ml tube. Then we  
531 electrophoresed the pooled dual-indexed libraries using a 2% E-Gel Size Select agarose gel  
532 (Invitrogen, CA, USA) and excised the target amplicons (ca. 370 bp) by retrieving them from the  
533 recovery wells using a micropipette. The concentration of the size-selected libraries was  
534 measured using a Qubit dsDNA HS assay kit and a Qubit fluorometer (Life Technologies, CA,  
535 USA), diluted them at 12.0 pM with HT1 buffer (Illumina, CA, USA) and sequenced on the

536 MiSeq platform using a MiSeq v2 Reagent Kit for  $2 \times 150$  bp PE (Illumina, CA, USA) following  
537 the manufacturer's protocol. We subjected the pooled dual-indexed libraries a MiSeq run with a  
538 PhiX Control library (v3) spike-in (expected at 5%).

539  
540 **Data preprocessing and taxonomic assignment.** We performed data preprocessing and  
541 analysis of MiSeq raw reads using USEARCH v10.0.240<sup>79</sup> according to the following steps: 1)  
542 Forward (R1) and reverse (R2) reads were merged by aligning the two reads using the  
543 *fastq\_mergepairs* command. During this process, low-quality tail reads with a cut-off threshold  
544 set at a quality (Phred) score of 2, too short reads (<100 bp) after tail trimming and those paired  
545 reads with too many differences (>5 positions) in the aligned region (*ca.* 65 bp) were discarded;  
546 2) primer sequences were removed from those merged reads using the *fastx\_truncate* command;  
547 3) those reads without the primer sequences underwent quality filtering using the *fastq\_filter*  
548 command to remove low quality reads with an expected error rate of >1% and too short reads of  
549 <120 bp; 4) the preprocessed reads were dereplicated using the *fastx\_uniques* command and all  
550 singletons, doubletons, and tripletons were removed from the subsequent analysis following the  
551 recommendation by the author of the program<sup>79</sup>; 5) the dereplicated reads were denoised using  
552 the *unoise3* command to generate amplicon sequence variants (ASVs) that remove all putatively  
553 chimeric and erroneous sequences<sup>80</sup>; 6) finally ASVs were subjected to taxonomic assignments  
554 to species names (metabarcoding operational taxonomic units; MOTUs) using the  
555 *usearch\_global* command with a sequence identity of >98.5% with the reference sequences and a  
556 query coverage of  $\geq 90\%$  (two nucleotide differences allowed).

557 Those ASVs with the sequence identities of 80–98.5% were tentatively assigned “U98.5”  
558 labels before the corresponding species name with the highest identities (*e.g.*,  
559 U98.5\_*Synbranchus marmoratus*) and they were subjected to clustering at the level of 0.985  
560 using *cluster\_smallmem* command. An incomplete reference database necessitates this clustering  
561 step that enables detection of multiple MOTUs under an identical species name. We annotated  
562 such multiple MOTUs with “gotu1, 2, 3...” and tabulated all the outputs (MOTUs plus  
563 U98.5\_MOTUs) with read abundances. We excluded those ASVs with sequence identities of  
564 <80% (saved as “no\_hit”) from the above taxonomic assignments and downstream analyses,

565 because all of them were found to be non-fish organisms. For a reference database, we used  
566 MiFish DB ver. 36 for taxa assignment, which contained 7,973 species distributed across 464  
567 families and 2,675 genera. In addition, we downloaded all the fish whole mitochondrial genome  
568 and 12S rRNA gene sequences from Genbank as of 15 December 2020.

569 We refined the above automatic taxonomic assignments with reference to a family-level  
570 phylogeny based on MiFish sequences from both MOTUs and the reference database. For each  
571 family, we assembled representative sequences (most abundant reads) from MOTUs (including  
572 U98.5) and added all reference sequences from that family and an outgroup (a sequence from a  
573 closely-related family) in FASTA format. We subjected the FASTA file to multiple alignment  
574 using MAFFT<sup>81</sup> with a default set of parameters. We constructed a neighbor-joining (NJ) tree  
575 with the aligned sequences in MEGA7<sup>82</sup> using pairwise deletion of gaps and the Kimura two-  
576 parameter distances<sup>83</sup> with the among-site rate variations modeled with gamma distributions  
577 (shape parameter = 1). We assessed statistical support for internal branches of the NJ tree using  
578 the bootstrap resampling technique (100 resamplings). In addition, aligned sequences were  
579 submitted to Bayesian Inference (BI) analyses run for 10 million generations sampling every  
580 1000 generations to determine posterior probability for each MOTU and reference sequences.  
581 Models were obtained on JModeltest2<sup>84</sup>. BI analyses were run in the Mr. Bayes v3.2.7<sup>85</sup>. Some  
582 of the BI analyses were conducted on the CIPRES science gateway v3.3<sup>86</sup>. Trees were analyzed  
583 and rendered in iTOL v5.7<sup>87</sup>.

584 The MiSeq paired-end sequencing ( $2 \times 150$  bp) of the 11 libraries, together with an  
585 additional 88 libraries (total = 99), yielded a total of 5,274,381 reads, with an average of 96.5%  
586 base calls, with Phred quality scores of  $\geq 30.0$  (Q30; error rate = 0.1% or base call accuracy =  
587 99.9%). This run was highly successful considering the manufacture's guidelines (Illumina  
588 Publication no. 770-2011-001 as of 27 May 2014) are  $>80\%$  bases  $\geq Q30$  at  $2 \times 150$  bp.

589 Of the 5,274,381 reads, a total of 1,903,160 reads were assigned to the 11 libraries, and  
590 the number of raw reads for each library ranged from 135,818 to 213,952 with an average of  
591 173,015 reads (Table S8). After merging the two overlapping paired-end FASTq files (1,826,828  
592 reads [96.0%]), the primer-trimmed sequences were subjected to quality filtering to remove low-  
593 quality reads (1,802,098 reads [94.7%]). The remaining reads were dereplicated for subsequent

594 analysis, and single- to tripletons were removed from the unique sequences as recommended by  
595 the author of the program<sup>79</sup>. Then, reads were denoised to remove putatively erroneous and  
596 chimeric sequences, and the remaining 1,677,402 reads (88.1% of the raw reads) were subjected  
597 to taxon assignments. Of these, 1,671,871 reads (99.7% of the denoised reads) were putatively  
598 considered as sequences for fishes, and BLAST searches indicated that non-fish sequences  
599 (5,531 reads [0.3%]) mostly consisted of mammals (i.e., cows, pigs, and humans) and a few  
600 unknown sequences. The three negative controls (i.e., EB, 1B, and 2B) were subjected to the  
601 same analysis pipeline and yielded only 103 denoised reads in total (only 0.006% of the total raw  
602 reads), which were not taken into consideration in the subsequent analyses as their subtraction  
603 from the corresponding species did not affect the presence/absence data matrix of sequences  
604 assignable to fishes. Contamination from non-Amazonian fishes at Miya's lab was detected and  
605 removed (Table S9).

606

## 607 **Statistical analyses**

608 All statistical analyses were conducted in R v.4.0.2<sup>88</sup>.

609

## 610 **Community structure - Molecular-based sampling (MBS)**

611 Evaluation of species richness for eDNA included all 11 samples from the river and stream  
612 localities. Specifically for river: five samples from station 1 (JAV2017081606) and one sample  
613 from station 3 (QUI 2017082906); stream: five samples from station 2 (JAV2017082108).  
614 Species richness between CBS and MBS was performed by comparing fish assemblages  
615 captured and detected in stations 1 and 2 only.

616 Species abundance per order was evaluated by heatmaps produced in *ggplot2*<sup>89</sup>.

617 Composition per Similarity among all 11 samples, three stations, versus stream and river  
618 assemblages were calculated using the Pearson correlation coefficient. Then, we calculated  
619 Jaccard's dissimilarities, and the coefficient values were ordinated using non-metric  
620 multidimensional scaling (NMDS) to visualize how replicated eDNA data discriminate sites and  
621 habitat (streams vs. rivers) patterns and to determine the sampling effort needed to identify  
622 community changes among sites in the VEGAN package version 2.4–4<sup>90</sup>. A 3D graph was

623 produced in CAR<sup>91</sup> and GLR version 0.103.5<sup>92</sup> packages. Differences in species compositions  
624 between sites and habitat types were statistically tested by permutational analysis of similarities  
625 (ANOSIM). It allowed for test of the statistical significance of similarity between groups  
626 comparing to the within groups similarity using the rank of similarity values<sup>36</sup>. A chord diagram  
627 showing the inter-relationship between species composition and habitat (river versus stream) was  
628 produced using the Circlize package<sup>93</sup>. Fish silhouettes were produced in Fishsualize v. 0.2.1<sup>94</sup>  
629 with the addition of a species of Gymnotiformes.

### 630 **Species richness**

631 Water samples station 1 and station 2: The number of detected taxa between CBS and MBS were  
632 represented by Venn diagrams. Rarefaction species accumulation curve for capture-based  
633 sampling were calculated for stations 1 and 2<sup>95</sup> using iNEXT package in R<sup>96</sup> for Hill number  
634 with order  $q = 0$  (species richness) with 1000 bootstraps. The dissimilarity species composition  
635 among samples in stations 1 and 2 were assessed by calculating pairwise Jaccard's distances with  
636 the function *vegdist*. Bias-corrected estimators Chao II<sup>97</sup> was applied to calculate species  
637 richness detected by MBS, as suggested by<sup>98</sup>. It was calculated in SpadeR package in R<sup>99</sup>.  
638 Species accumulation curves for molecular-based sampling were built using the function  
639 *specaccum* in VEGAN package v2.5.4<sup>90</sup>. Graphs were plotted using *ggplot2*.

640

### 641 **References**

- 642 1. Lundberg J. G., M. Kottelat, G. R. Smith, M. L. J. Stiassny, & A. C. Gill. 2000. So Many Fishes,  
643 So Little Time: An Overview of Recent Ichthyological Discovery in Continental Waters.  
644 *Annals of the Missouri Botanical Garden*, 87: 26–62.
- 645 2. Relyea R. A. 2005. The impact of insecticides and herbicides on the biodiversity and  
646 productivity of aquatic communities. *Ecological Applications*, 15: 618–627.
- 647 3. Miya M., Y. Sato, T. Sado, J. Y. Poulsen, K. Sato, T. Minamoto, S. Yamamoto, H. Yamanaka,  
648 H. Araki, M. Kondoh, & W. Ywasaki. 2015. MiFish, a set of universal PCR primers for  
649 metabarcoding environmental DNA from fishes: detection of more than 230 subtropical  
650 marine species. *Royal Society Open Science*, 2: 150088.

- 651 4. Clare A. I. M., M. Knapp, N. J. Gemmell, J. Gert-Jan, M. Bunce, M. D. Lamare, H. R. Taylor,  
652 R. Helen. 2019. Beyond Biodiversity: Can Environmental DNA (eDNA) Cut It as a  
653 Population Genetics Tool? *Genes*, 10: 192.
- 654 5. Tsuji S., N. Shibata, H. Sawada, & M. Ushio. 2020. Quantitative evaluation of intraspecific  
655 genetic diversity in a natural fish population using environmental DNA. *Molecular Ecology*  
656 *Resources*, 20: 1323–1332.
- 657 6. Miya M., R. O. Gotoh, & T. Sado. 2020. MiFish metabarcoding: a high-throughput approach  
658 for simultaneous detection of multiple fish species from environmental DNA and other  
659 samples. *Fisheries Science*, 86: 939–970.
- 660 7. Dagosta F. C. P. & M. C. C. de Pinna. 2019. The fishes of the Amazon: distribution and  
661 biogeographical patterns, with a comprehensive list of species. *Bulletin of the American*  
662 *Museum of Natural History*, 431.
- 663 8. Jézéquel C., P. A. Tedesco, & R. Bigorne. 2020. A database of freshwater fish species of the  
664 Amazon Basin. *Scientific Data*, 7: 96.
- 665 9. Reis R. E., S. O. Kullander, & C. J. Ferraris. 2003. Check list of the freshwater fishes of South  
666 and Central America. Edipucrs.
- 667 10. Tedesco P., *et al.* 2017. A global database on freshwater fish species occurrence in drainage  
668 basins. *Scientific Data* 4: 170141.
- 669 11. Brito P. M., F. J. Meunier, & M. E. C. Leal. 2007. Origine  
670 et diversification de l'ichthyofaune Neotropical: une revue. *Cybium*, 31: 139-153.
- 671 12. Lowe-McConnell R. H. 1987. Ecological studies in tropical fish communities. Cambridge  
672 Tropical Biology Series. Cambridge University Press, Cambridge.
- 673 13. Bloom D. D. & N. R. Lovejoy. 2017. On the origins of marine derived fishes in South  
674 America. *Journal of Biogeography*, 44: 1927–1938.
- 675 14. de Santana C. D., *et al.* 2019. Unexpected species diversity in electric eels with a description  
676 of the strongest living bioelectricity generator. *Nature Communications*, 10: 4000.
- 677 15. Carvalho, L. N., J. Zuanon, & I. Sazima. 2007. Natural history of Amazon fishes. *In*: K. Del-  
678 Claro (Ed.), Tropical Biology and Natural Resources Theme, *In*: K. Del- Claro & R. J.



- 679 Marquis (Session Eds. the Natural History Session), Encyclopedia of Life Support Systems  
680 (EOLSS). Eolss Publishers, Oxford.
- 681 16. Cardoso Y. P., J. J. Rosso, E. Mabragaña, M. Gonzalez-Castro, M. Delpiani, & E.  
682 Avigliano. 2018. A continental-wide molecular approach unraveling mtDNA diversity and  
683 geographic distribution of the Neotropical genus *Hoplias*. *Plos One*, 13: e0202024.
- 684 17. Hebert P. D. N., A. Cywinska, S. L. Ball, & J. R. de Waard. 2003. Biological identifications  
685 through DNA barcodes. *Proceedings of the Royal Society London. Series B: Biological*  
686 *Sciences*, 270: 313–321.
- 687 18. Baldwin, C. C., C. I. Castillo, L. A. Weigt, & B. C. Victor. 2011. Seven new species within  
688 western Atlantic *Starksia atlantica*, *S. lepicoelia*, and *S. sluiteri* (Teleostei, Labrisomidae),  
689 with comments on congruence of DNA barcodes and species. *ZooKeys*, 79: 21—27.
- 690 19. Robertson D. R., A. Angulo, C. C. Baldwin, C. Pitassy, E. Diane, A. W. Driskell, L. A.  
691 Weigt, A. Lee & I. J. F. Navarro. 2017. Deep-water bony fishes collected by the B/O Miguel  
692 Oliver on the shelf edge of Pacific Central America: an annotated, illustrated and DNA-  
693 barcoded checklist. *Zootaxa*, 4348: 1–125.
- 694 20. Weigt L. A., C. C. Baldwin, A. Driskell, D.G. Smith, A. Ormos, & E. A. Reyier. 2012. Using  
695 DNA Barcoding to Assess Caribbean Reef Fish Biodiversity: Expanding Taxonomic and  
696 Geographic Coverage. *Plos One*, 7: e41059.
- 697 21. Seberg O., G. Droege, K. Barker, J. A. Coddington, V. Funk, M. Gostel., G. Petersen, & P. P.  
698 Smith. 2016. Global Genome Biodiversity Network: saving a blueprint of the Tree of Life -  
699 a botanical perspective. *Annals of Botany*, 118: 393–399.
- 700 22. Parenti L. R., D. Pitassy, Z. Jaafar, K. Vinnikov, N. E. Redmond & K. S. Cole. 2020. Fishes  
701 collected during the 2017 MarineGEO assessment of Kāneʻohe Bay, Oʻahu, Hawaiʻi.  
702 *Journal of the Marine Biological Association of the United Kingdom*, 100: 607–637.
- 703 23. Droege G. *et al.* 2016. The Global Genome Biodiversity Network (GGBN) Data Standard  
704 specification. *Database*: 10.1093/database/baw125.
- 705 24. Marques, V., P. É. Guérin, M. Rocle, A. Valentini, S. Manel, D. Mouillot, & T. Dejean,  
706 2020. Blind assessment of vertebrate taxonomic diversity across spatial scales by clustering  
707 environmental DNA metabarcoding sequences. *Ecography*, 43: 1779–1790.

- 708 25. Leray, M., N. Knowlton, Shien-Lei, H., B. N. Nguyen, & R. J. Machida. 2019. GenBank is a  
709 reliable resource for 21<sup>st</sup> biodiversity research. *Proceedings National Academy of Sciences*,  
710 116: 22651–22656.
- 711 26. Dillman C. B., P. Zhuang, T. Zhang, L.-Z. Zhang, N. Mugue, E. J. Hilton. 2014. Forensic  
712 investigations into a GenBank anomaly: endangered taxa and the importance of voucher  
713 specimens in molecular studies. *Journal of Applied Ichthyology*, 30: 1300–1309.
- 714 27. Locatelli N. S., P. B. McIntyre, N. O. Therkildsen, & D. S. Baetscher. 2020. GenBank’s  
715 reliability is uncertain for biodiversity researchers seeking species-level assignment for  
716 eDNA. *Proceedings of the National Academy of Sciences of the United States of America*,  
717 117: 32211–32212.
- 718 28. Jerde C. L., E. A. Wilson, & T. L. Dressler. 2019. Measuring global fish species richness  
719 with eDNA metabarcoding. *Molecular Ecology Resources*, 19: 19–22.
- 720 29. Nobile A. B., D. Freitas-Souza, F.J. Ruiz-Ruano, M. L. M. O. Nobile, G. O. Costa, F. P. de  
721 Lima, J. P. M. Camacho, F. Foresti, & C. Oliveira. 2019. DNA metabarcoding of  
722 Neotropical ichthyoplankton: enabling high accuracy with lower cost. *Metabarcoding and*  
723 *Metagenomics*, 3: e.35060.
- 724 30. Cilleros K., A. Valentini, A. Cerdan, T. dejean, A. Iribar, P. Taberlet, R. Vigouroux, & R.  
725 Brosse. 2019. Unlocking biodiversity and conservation studies in high diversity  
726 environments using environmental DNA (eDNA): a text with Guianese freshwater fishes.  
727 *Molecular Ecology Resources*, 19: 27–46.
- 728 31. Sales N. G., O. S. Wangenstein, D. C. Carvalho, & S. Mariani. 2019. Influence of  
729 preservation methods, sample medium and sampling time on eDNA recovery in a  
730 neotropical river. *Environmental DNA*, 1: 119–130.
- 731 32. Jackman J. M. C. *et al.* 2021. eDNA in a bottleneck: obstacles to fish metabarcoding studies  
732 in megadiverse freshwater systems. *Environmental DNA*: 10.1002/edna3.191
- 733 33. Valentini A., *et al.* 2016. Next-generation monitoring of aquatic biodiversity using  
734 environmental DNA metabarcoding. *Molecular Ecology*, 25: 929–942.

- 735 34. McElroy M. E., *et al.* 2020. Calibrating environmental DNA metabarcoding to conventional  
736 surveys for measuring fish species richness. *Frontiers in Ecology and Evolution*, 8: 276.
- 737 35. Dudgeon D. 2020. Freshwater Biodiversity: Status, Threats and Conservation. Cambridge  
738 University Press.
- 739 36. Clarke K. R. 1993. Non-parametric multivariate analyses of changes in community structure.  
740 *Austral Ecology*, 18: 117–143.
- 741 37. Milan D. T., I. S. Mendes & D. C. Carvalho. 2020. New 12S metabarcoding primers for  
742 enhanced Neotropical freshwater fish biodiversity assessment. *Scientific Reports*, 10:  
743 17966.
- 744 38. Deagle B. E., S. N. Jarman, E. Coissac, F. Pompanon, & P. Taberlet. 2014. DNA  
745 metabarcoding and the cytochrome c oxidase subunit I marker: Not a perfect match.  
746 *Biology Letters*, 10: 20140562.
- 747 39. Collins R. A., J. Bakker, O. S. Wangensteen, A. Z. Soto, L. Corrigan, D. W. Sims, M. J.  
748 Genner, & S. Mariani. 2019. Non-specific amplification compromises environmental  
749 DNA metabarcoding with COI. *Methods in Ecology and Evolution*, 10: 1985–2001.
- 750 40. Antich A., *et al.* 2021. To denoise or to cluster, that is not the question: optimizing pipelines  
751 for COI metabarcoding and metaphylogeography. *BMC Bioinformatics* 22: 177.
- 752 41. Vieira T. B., C. S. Pavanelli, L. Casatti, W.S. Smith, E. Benedito, & R. Mazzoni. 2018. A  
753 multiple hypothesis approach to explain species richness patterns in neotropical stream-  
754 dweller fish communities. *Plos One*, 13: e0204114.
- 755 42. Zuanon J., F. A. Bockmann, & I. Sazima. 2006. A remarkable sand-dwelling fish assemblage  
756 from central Amazonia, with comments on the evolution of psammophily in South  
757 American freshwater fishes. *Neotropical Ichthyology*, 4: 107–118.
- 758 43. Sazima I., Carvalho L. N., Mendonça F. P., & Zuanon J. 2006. Fallen leaves on the water-  
759 bed: diurnal camouflage of three night-active fish species in an Amazonian streamlet.  
760 *Neotropical Ichthyology*, 4: 119–122.
- 761 44. Espírito-Santo H. M. V., & J. Zuanon. 2017. Temporary pools provide stability to fish  
762 assemblages in Amazon headwater streams. *Ecology of Freshwater Fish*, 26: 475–483.

- 763 45. de Pinna, M. C. C., J. Zuanon, L. R. Rapp-Py-Daniel, & P. Petry. 2018. A new family of  
764 neotropical freshwater fishes from deep fossorial Amazonian habitat, with a reappraisal of  
765 morphological characiform phylogeny (Teleostei: Ostariophysi). *Zoological Journal of the*  
766 *Linnean Society*, 182: 76–106.
- 767 46. López-Rojas H., J. G. Lundberg, & E. Marsh. 1984. Design and operation of a small trawling  
768 apparatus for use with dugout canoes. *North American Journal of Fisheries Management*,  
769 4: 331–334.
- 770 47. Marrero C. & D. C. Taphorn. 1991. Notas sobre la historia natural y la distribution de los peces  
771 Gymnotiformes in la cuenca del Rio Apure y otros rios de la Orinoquia. *Biollania*, 8: 123–142.
- 772 48. Cox-Fernandes C., J. Podos, & J. G. Lundberg. 2004. Amazonian Ecology: tributaries  
773 enhance the diversity of electric fishes. *Science*, 305: 1960–1962.
- 774 49. Peixoto L. A. W., G. M. Dutra, & W. B. Wosiack. 2015. The electric. Glassknife fishes of  
775 the *Eigenmannia trilineata* group (Gymnotiformes: Sternopygidae): monophyly and  
776 description of seven new species. *Zoological Journal of the Linnean Society*, 175: 384–414.
- 777 50. de Santana C. D. & R. P. Vari. 2010. Electric fishes of the  
778 genus *Sternarchorhynchus* (Teleostei, Ostariophysi, Gymnotiformes); phylogenetic and  
779 revisionary studies. *Zoological Journal of the Linnean Society*, 159: 223–371.
- 780 51. Castro R. M. C. 1999. Evolução da ictiofauna de riachos sul-americanos: padrões gerais e  
781 possíveis processos causais. In: Caramaschi EP, Mazzoni R, Peres-Neto PR. (Eds) *Ecologia*  
782 *de peixes de riachos*. Série Oecologia Brasiliensis volume VI, PPGE-UFRJ, Rio de Janeiro,  
783 139–155.
- 784 52. Mojica J. I., Castellanos C. & J. Lobón -Cerviá. 2009. High temporal species turnover  
785 enhances the complexity of fish assemblages in Amazonian Terra firme streams. *Ecology*  
786 *of Freshwater Fish*, 18: 518–526.
- 787 53. de Oliveira R. R., M. M. Rocha, M. B. Anjos, J. Zuanon, & L. H. Rapp Py-Daniel.  
788 2009. Fish fauna of small streams of the Catua-Ipixuna Extractive Reserve, State of  
789 Amazonas, Brazil. *Check List*, 5: 154–172.

- 790 54. Caramaschi E., P. R. Mazzoni, C. R. S. F. Bizerril, & P. R. Peres-Neto. 1999. Ecologia de  
791 Peixes de Riachos: Estado Atual e Perspectivas. *Oecologia Brasiliensis*, v. VI, Rio de  
792 Janeiro.
- 793 55. Anjos M. B. & J. Zuanon. 2007. Sampling effort and fish species richness in small Terra  
794 firme forest streams of central Amazonia, Brazil. *Neotropical Ichthyology*, 5: 45–52.
- 795 56. Mojica J. I., J. Lobón-Cerviá, & C. Castellanos. 2014. Quantifying fish species richness and  
796 abundance in Amazonian streams: assessment of a multiple gear method suitable for Terra  
797 firme stream fish assemblages. *Fisheries Management and Ecology*, 21: 220–233.
- 798 57. Barros D. F., J. Zuanon, F. P. Mendonça, H. M. V. Espirito-Santo, A. V. Galuch, & A. L. M  
799 Albernaz. 2011. The fish fauna of streams in the Madeira-Purus interfluvial region,  
800 Brazilian Amazon. *Check List*, 7: 768–773.
- 801 58. Escobar-Camacho D., R. Barriga, & S. R. Ron. 2015. Discovering Hidden Diversity of  
802 Characins (Teleostei: Characiformes) in Ecuador's Yasuní National Park. *Plos One*, 10:  
803 e0135569.
- 804 59. Ramirez J. L., J. L. Birindelli, D. C. Carvalho, P. R. A. M. Affonso, P. C. Venere, H. Ortega,  
805 M. Carrillo-Avila, J.A. Rodríguez-Pulido, & P. M. Galetti Jr. 2017. Revealing Hidden  
806 Diversity of the Underestimated Neotropical Ichthyofauna: DNA Barcoding in the Recently  
807 Described Genus *Megaleporinus* (Characiformes: Anostomidae). *Frontiers in Genetics*, 8:  
808 149.
- 809 60. Crampton W. G. R., C. D. de Santana, J. C. Waddell, & N. R. Lovejoy. 2016. The  
810 Neotropical electric fish genus *Brachyhypopomus* (Ostariophysi: Gymnotiformes:  
811 Hypopomidae): taxonomy and biology, with descriptions of 15 new species. *Neotropical*  
812 *Ichthyology*, 14: 639–790.
- 813 61. Abel R. 2002. Conservation biology for the biodiversity crisis: a freshwater follow-up.  
814 *Conservation Biology*, 5: 1435–1437.
- 815 62. Dudgeon D. 2010. Prospects for sustaining freshwater biodiversity in the 21st century:  
816 linking ecosystem structure and function. *Current Opinion in Environmental Sustainability*,  
817 5: 422–430.
- 818 63. Jenkins M. 2003. Prospects for biodiversity. *Science*, 302: 1175–1177.

- 819 64. Bunn S. E., C. A. Sullivan, C. R. Liermann, P. M. Davies, C. J. Vörösmarty, P. B. McIntire,  
820 M. O. Gessner, D. Dudgeon, A. Prusevich, P. Green & S. Glidden. 2010. Global threats to  
821 human water security and river biodiversity. *Nature*, 467: 555–561.
- 822 65. Albert J. S., *et al.* 2020. Scientists’ warning to humanity on the freshwater biodiversity crisis.  
823 *Ambio*, 50: 85–94.
- 824 66. Gilbert M. T. P., T. Haselkorn, M. Bunce, J. J. Sanchez, S. B. Lucas, L. D. Jewell, & M.  
825 Worobey. 2007. The isolation of nucleic acids from fixed, paraffin-embedded tissues—  
826 which methods are useful when? *Plos One*, 2: e537.
- 827 67. Campos P. F., & T. M. Gilbert. 2012. DNA extraction from formalin-fixed material. In  
828 *Ancient DNA* (pp. 81–85). Humana Press.
- 829 68. Hykin S. M., K. Bi, & J. A. McGuire. 2015. Fixing formalin: a method to recover genomic-  
830 scale DNA sequence data from formalin-fixed museum specimens using high-throughput  
831 sequencing. *Plos One*, 10: e0141579.
- 832 69. Hagedorn M. M., J. P. Daly, V. L. Carter, K. S. Cole, Z. Jaafar, C. V. Lager & L. R. Parenti.  
833 2018. Cryopreservation of fish spermatogonial cells: the future of natural history  
834 collections. *Scientific Reports*, 8: 6149.
- 835 70. Albert J. & R. E. Reis. 2011. *Historical biogeography of Neotropical freshwater fishes*.  
836 University of California Press, Berkeley and Los Angeles, California.
- 837 71. Sabaj Pérez M. H. 2015. Where the Xingu bends and will soon break. *American Scientist*,  
838 103: 395–403.
- 839 72. Amigo I. 2020. When will the Amazon hit a tipping point? *Nature*, 578: 505–507.
- 840 73. Murienne J., I. Cantera, A. Cerdan, J.B. Decotte, T. Dejean, R. Vigouroux, & S. Brosse.  
841 2019. Aquatic DNA for monitoring French Guiana biodiversity. *Biodiversity Data Journal*,  
842 7: e37518.
- 843 74. McDevitt A. D., *et al.* 2019. Environmental DNA metabarcoding as an effective and rapid  
844 tool for fish monitoring in canals. *Journal of Fish Biology*, 95: 679–682.
- 845 75. Fernandes G. W., M. M. Vale, G. E. Overbeck, M. M. Bustamante, C. E. Grelle, H. G.  
846 Bergallo & J. Araújo. 2017. Dismantling Brazil’s science threatens global biodiversity  
847 heritage. *Perspectives in Ecology and Conservation*, 15: 239–243.

- 848 76. Alves R. J. V., M. Weksler, J. A. Oliveira, P. A. Buckup, H. R. Santana, A. L. Peracchi & A.  
849 L. Albernaz. 2018. Brazilian legislation on genetic heritage harms Biodiversity Convention  
850 goals and threatens basic biology research and education. *Anais da Academia Brasileira de*  
851 *Ciências*, 90: 1279–1284.
- 852 77. Overbeck G. E., H. G. Bergallo, C. E. Grelle, A. Akama, F. Bravo, G. R. Colli & G. W.  
853 Fernandes. 2018. Global biodiversity threatened by science budget cuts in Brazil.  
854 *BioScience*, 68: 11–12.
- 855 78. Miya M., T. Minamoto, H. Yamanaka, S. Oka, K. Sato, S. Yamamoto, T. Sado, & H. Doi.  
856 2016. Use of a filter cartridge for filtration of water samples and extraction of environmental  
857 DNA. *Journal of Visualized Experiments*, 117: 54741.
- 858 79. Edgar R. C. 2010. Search and clustering orders of magnitude faster than BLAST.  
859 *Bioinformatics*, 26: 2460–2461.
- 860 80. Callahan B. J., P. J. McMurdie & S. P. Holmes. 2017. Exact sequence variants should replace  
861 operational taxonomic units in marker-gene data analysis. *The ISME Journal*, 11: 2639–  
862 2643.
- 863 81. Katoh K. & D. M. Standley. 2013. MAFFT multiple sequence alignment software version 7:  
864 Improvements in performance and usability. *Molecular Biology and Evolution*, 30: 772–  
865 780.
- 866 82. Kumar S., G. Stecher, & K. Tamura. 2016. MEGA7: Molecular evolutionary genetics  
867 analysis version 7.0 for bigger datasets. *Molecular Biology and Evolution*, 33: 1870–1874.
- 868 83. Kimura M. 1980. A simple method for estimating evolutionary rates of base substitutions  
869 through comparative studies of nucleotide sequences. *Journal of Molecular Evolution*, 16:  
870 111–120.
- 871 84. Darriba D., G. L. Taboada, R. Doallo, & D. Posada. 2012. jModelTest 2: more models, new  
872 heuristics and parallel computing. *Nature Methods*, 9: 772.
- 873 85. Ronquist F., M. Teslenko, P. van der Mark, D.L. Ayres, A. Darling, S. Höhna, B. Larget, L.  
874 Liu, M.A. Suchard & J. P. Huelsenbeck. 2012. MrBayes 3.2: efficient Bayesian phylogenetic  
875 inference and model choice across a large model space. *Systematics Biology*, 61: 539–542.

- 876 86. Miller M. A., *et al.* 2015. A RESTful API for Access to Phylogenetic Tools via the CIPRES  
877 Science Gateway. *Evolutionary Bioinformatics*, 11: 43–48.
- 878 87. Ciccarelli F. D., T. Goerks, C. von Mering, C. J. Creevey, B. Snel, & P. Bork. 2006. Toward  
879 Automatic Reconstruction of a Highly Resolved Tree of Life. *Science*, 311: 1283–1287.
- 880 88. R Core Team. 2020. R: A language and environment for statistical computing. R Foundation  
881 for Statistical Computing, Vienna, Austria. <https://www.R-project.org/>
- 882 89. Wickham H. 2016. Ggplot2: Elegant graphics for data analysis. *Houston, TX: Springer*.
- 883 90. Oksanen J., R. Kindt, & B. O’Hara. 2013. Package VEGAN. *Community Ecology Package*,  
884 Version 2.
- 885 91. Fox J. & S. Weisberg. 2019. *An R Companion to Applied Regression*, Third edition. Sage,  
886 Thousand Oaks CA.
- 887 92. Adler D., O. Nenadic, & W. Zucchini. 2013. rgl: 3D visualization device system (OpenGL).  
888 *R package version* 0.93.945, URL <http://CRAN.R-project.org/package=rgl>.
- 889 93. Gu Z. 2014. Circlize implements and enhances circular visualization in R. *Bioinformatics*,  
890 30: 2811–2812.
- 891 94. Schiettekatte N. M. D., S. J. Brandl, & J. M. Casey. 2019. Fishualize: color palettes based  
892 on fish species. CRAN version 0.2.0.
- 893 95. Chao A. 1989. Estimating Population Size for Sparse Data in Capture-Recapture  
894 Experiments. *Biometrics*, 45: 427.
- 895 96. Hsieh T. C., K. H. Ma, A. Chao. 2020. *iNEXT: Interpolation and Extrapolation for Species*  
896 *Diversity*. R package version 2.0.20
- 897 97. Chao A., R. L. Chazdon, R. K. Colwell, & T.-J. Shen. 2005. A new statistical approach for  
898 assessing compositional similarity based on incidence and abundance data. *Ecology*  
899 *Letters*, 8: 148–15.
- 900 98. Olds B. P., C. L. Jerde, M. A. Renshaw, L. Yiu, N. T. Evans, C. R. Turner, K. Deiner, A.  
901 R. Mahon, M. A. Brueseke, P. D. Shirey, M. E. Pfrende, D. M. Lodge, & G. A. Lambert.  
902 2016. Estimating species richness using environmental DNA. *Ecology and Evolution*, 6:  
903 4214–4226.



904 99. Chao A., K. H. Ma, T. C. Hsieh, T. C. & C. H. Chiu. 2016. SpadeR (Species-richness  
905 Prediction And Diversity Estimation in R): an R package in CRAN. Program and User's  
906 Guide also published at [http://chao.stat.nthu.edu.tw/wordpress/software\\_download/](http://chao.stat.nthu.edu.tw/wordpress/software_download/).

907

908

909 **Figures**

910

911 **Figure 1.** Map of Javari River basin showing 46 sampling stations (white and red dots). Red dots  
912 represent stations in two distinct ecosystems (River: stations 1 – Javari, 3 – Quixito; Stream:  
913 station 2 – Terra firme stream) sampled by capture and molecular based methodologies. In the  
914 map one dot can represent more than one station. Illustration of 12 orders detected by capture-  
915 based sampling (CBS) and molecular based sampling (MBS) in the three stations: (A)  
916 Beloniformes – *Potamorrhaphis guianensis*, INPA-ICT 055254, station 2(CBS); (B)  
917 Cyprinodontiformes – *Laimosemion* sp., INPA-ICT 056039, station 2(CBS); (C)  
918 Osteoglossiformes – *Osteoglossum bicirrhosum*, INPA-ICT 056354; (D) Clupeiformes –  
919 *Anchoviella jamesi*, INPA-ICT 055391, stations 1&3(CBS); (E) Characiformes – *Chalceus*  
920 *erythrurus*, INPA-ICT 055360, stations 1(CBS, MBS), 2(MBS); (F) Cichliformes – *Crenicichla*  
921 *reticulata*, INPA-ICT 055413, station 1(CBS); (G) Perciformes – *Plagioscion squamosissimus*,  
922 INPA-ICT 055328, stations 1(CBS, MBS), 3(CBS); (H) Synbranchiformes – *Synbranchus* sp.,  
923 INPA-ICT 055815, station 2(MBS); (I) Gymnotiformes – *Eigenmannia limbata*, INPA-ICT  
924 055420, stations 1 & 3(CBS, MBS), 2(MBS); (J) Pleuronectiformes – *Apionichthys nattereri*,  
925 INPA-ICT 055487, stations 1(CBS, MBS), 3(MBS); (K) Siluriformes – *Brachyplatystoma*  
926 *vaillantii*, INPA-ICT 056703, station 1(MBS); (L) Myliobatiformes – *Potmotrygon scobina*,  
927 INPA-ICT 055553.

928

929 **Figure 2.** Illustrative cladogram with reads and frequencies for each of 222 metabarcoding  
930 operational taxonomic units (MOTUs) and reference sequences included in nine orders and 41  
931 families detected by 11 eDNA samples in the Javari River basin. Color highlighting MOTUs  
932 names corresponds to each of the nine orders. In the left side, species richness, key color, and  
933 general bauplan silhouettes for each order. At the center, spherical view of species diversity  
934 detected by eDNA.

935

936 **Figure 3.** Ichthyofauna segregation into river and stream at Javari Basin as detected by 11  
937 samples of eDNA in the three stations: stream (station 2): samples 1 to 6; Javari river (station 1):

938 Samples 6 to 10; and Quixito River (station 3): sample 11. (A) Heatmap based on the Pearson  
939 correlation coefficients between species composition and habitat. Note the difference in the  
940 species composition along the river, i.e., Javari versus Quixito rivers (B) Non-metric  
941 multidimensional scaling (NMDS) based on Jaccard's dissimilarities coefficients discriminating  
942 habitat (streams vs. rivers). The Stress of the NMDS plot 0.052 indicates that its first three axes  
943 provided an appropriate three dimensional representation of the habitats according to their  
944 species composition. Each dot represents a species and the relative distance between two points  
945 represents the dissimilarity. The ANOSIM  $p < 0.0001$  suggests that NMDS significantly  
946 distinguished between the river and stream communities; (C) Heatmap for species abundance for  
947 each of the five orders detected in the stream; (D) Heatmap showing species abundance for each  
948 of the eight orders detected in the Javari river and Quixito River. Note the alteration in species  
949 abundance between samples 5 to 10 (Javari) and 11 (Quixito). In samples 5 to 10 Characiformes  
950 and Siluriformes are more abundant. Conversely, Gymnotiformes and Siluriformes are more  
951 species rich in the sample 6. (E) Chord diagram showing the directional relationship between  
952 habitat and species richness distributed into the nine detected orders.

953  
954 **Figure 4.** Comparison between Capture-Based Sampling (CBS) in blue and Molecular-Based  
955 Sampling (MBS) in red in two sampled localities. Javari River: (A) Histogram comparing the  
956 number of species per order detected by CBS and MBS; (B) Venn diagram of the number of  
957 orders detected by CBS and MBS; (C) Rarefaction species accumulation curve for CBS with  
958 95% confidence interval and extrapolation for twice the number of individuals sampled. Terra  
959 firme stream: (D) Histogram comparing the number of species per order detected by CBS and  
960 MBS; (E) Venn diagram of the number of orders detected by CBS and MBS; (F) Rarefaction  
961 species accumulation curve for CBS with 95% confidence interval and extrapolation for twice  
962 the number of individuals sampled.

963

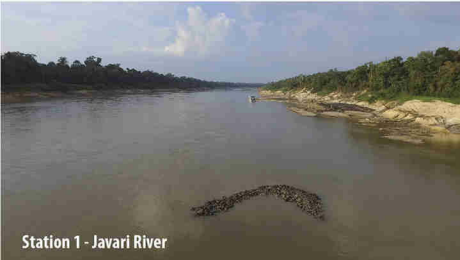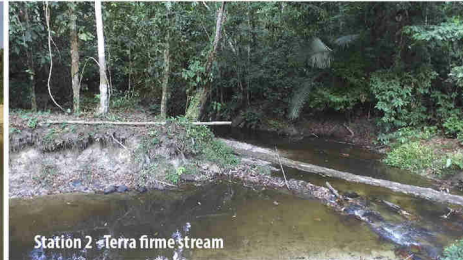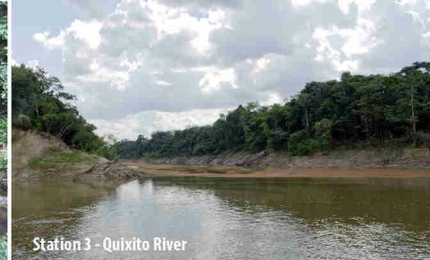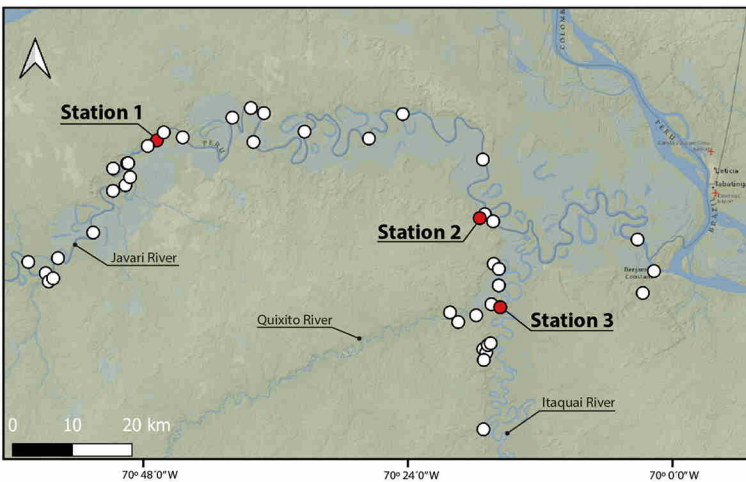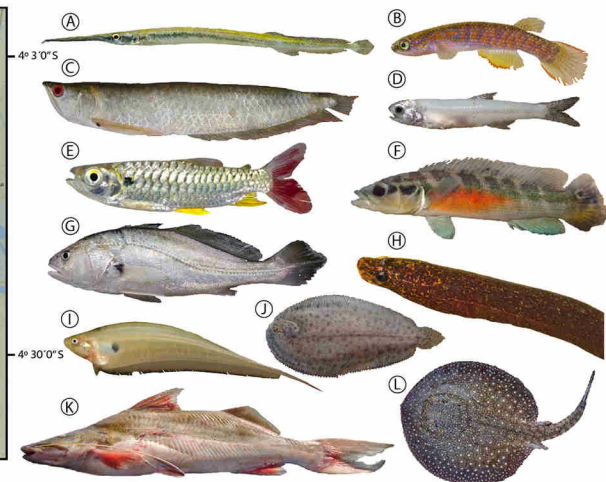

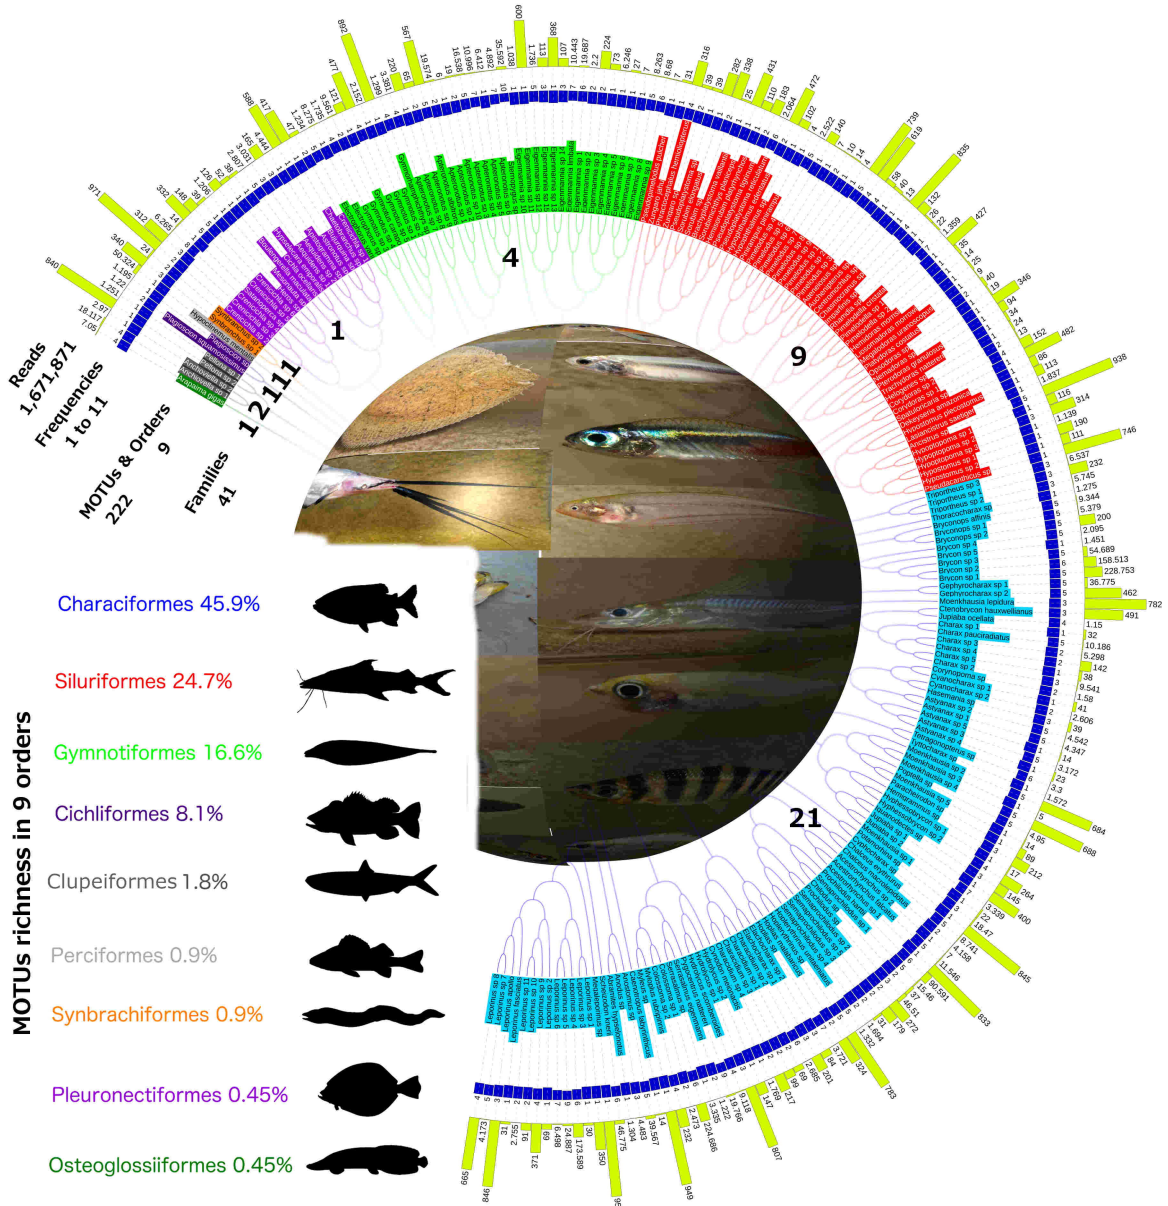

**A**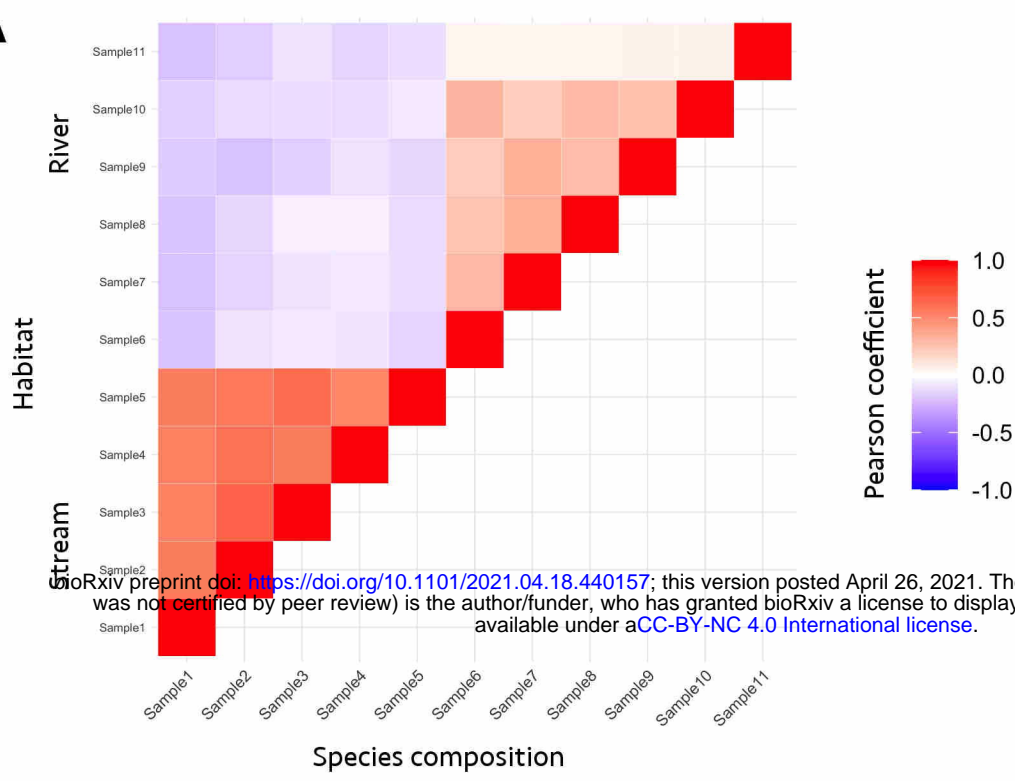**B**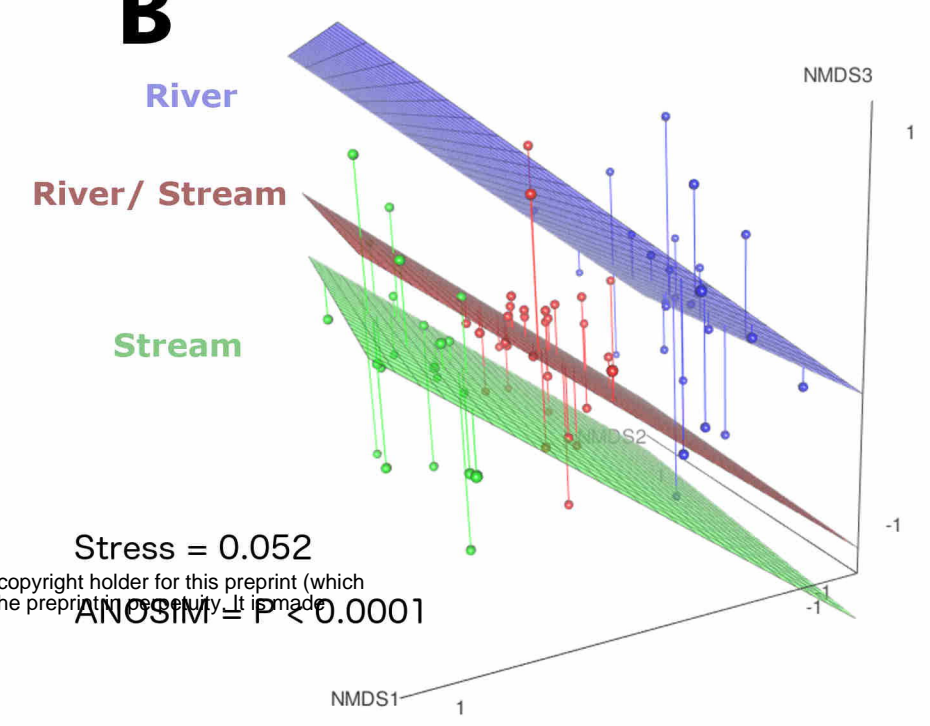**C**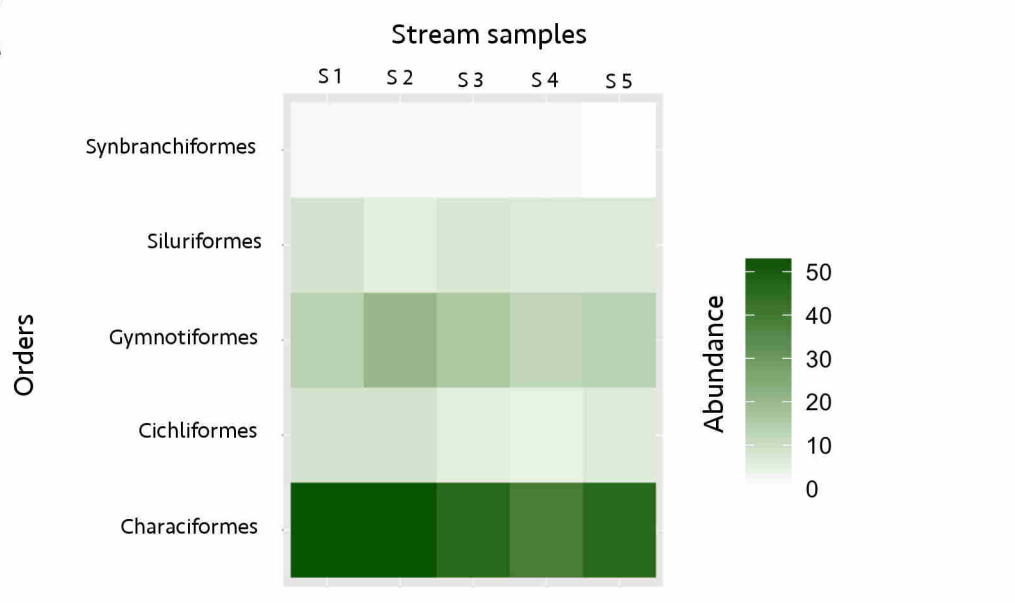**D**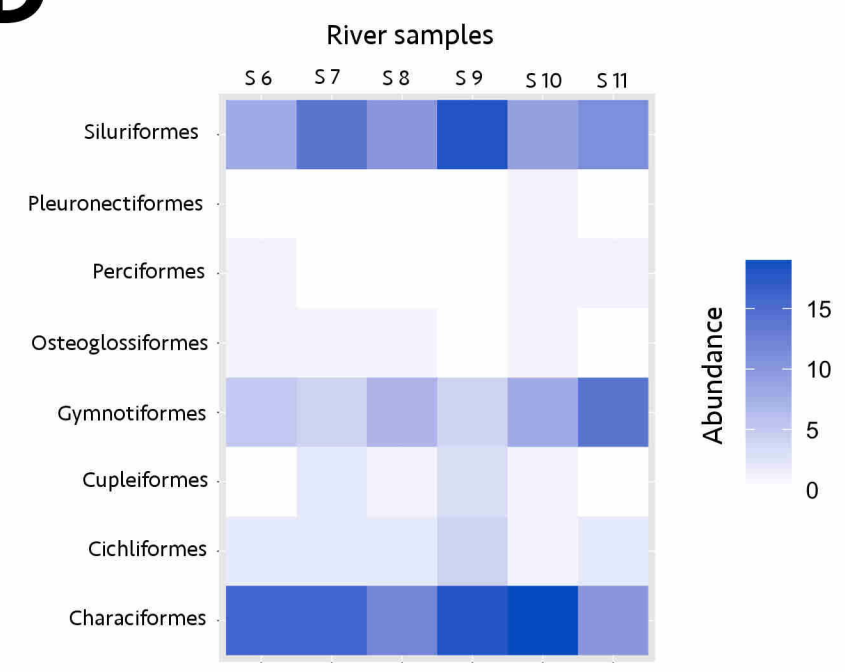**E**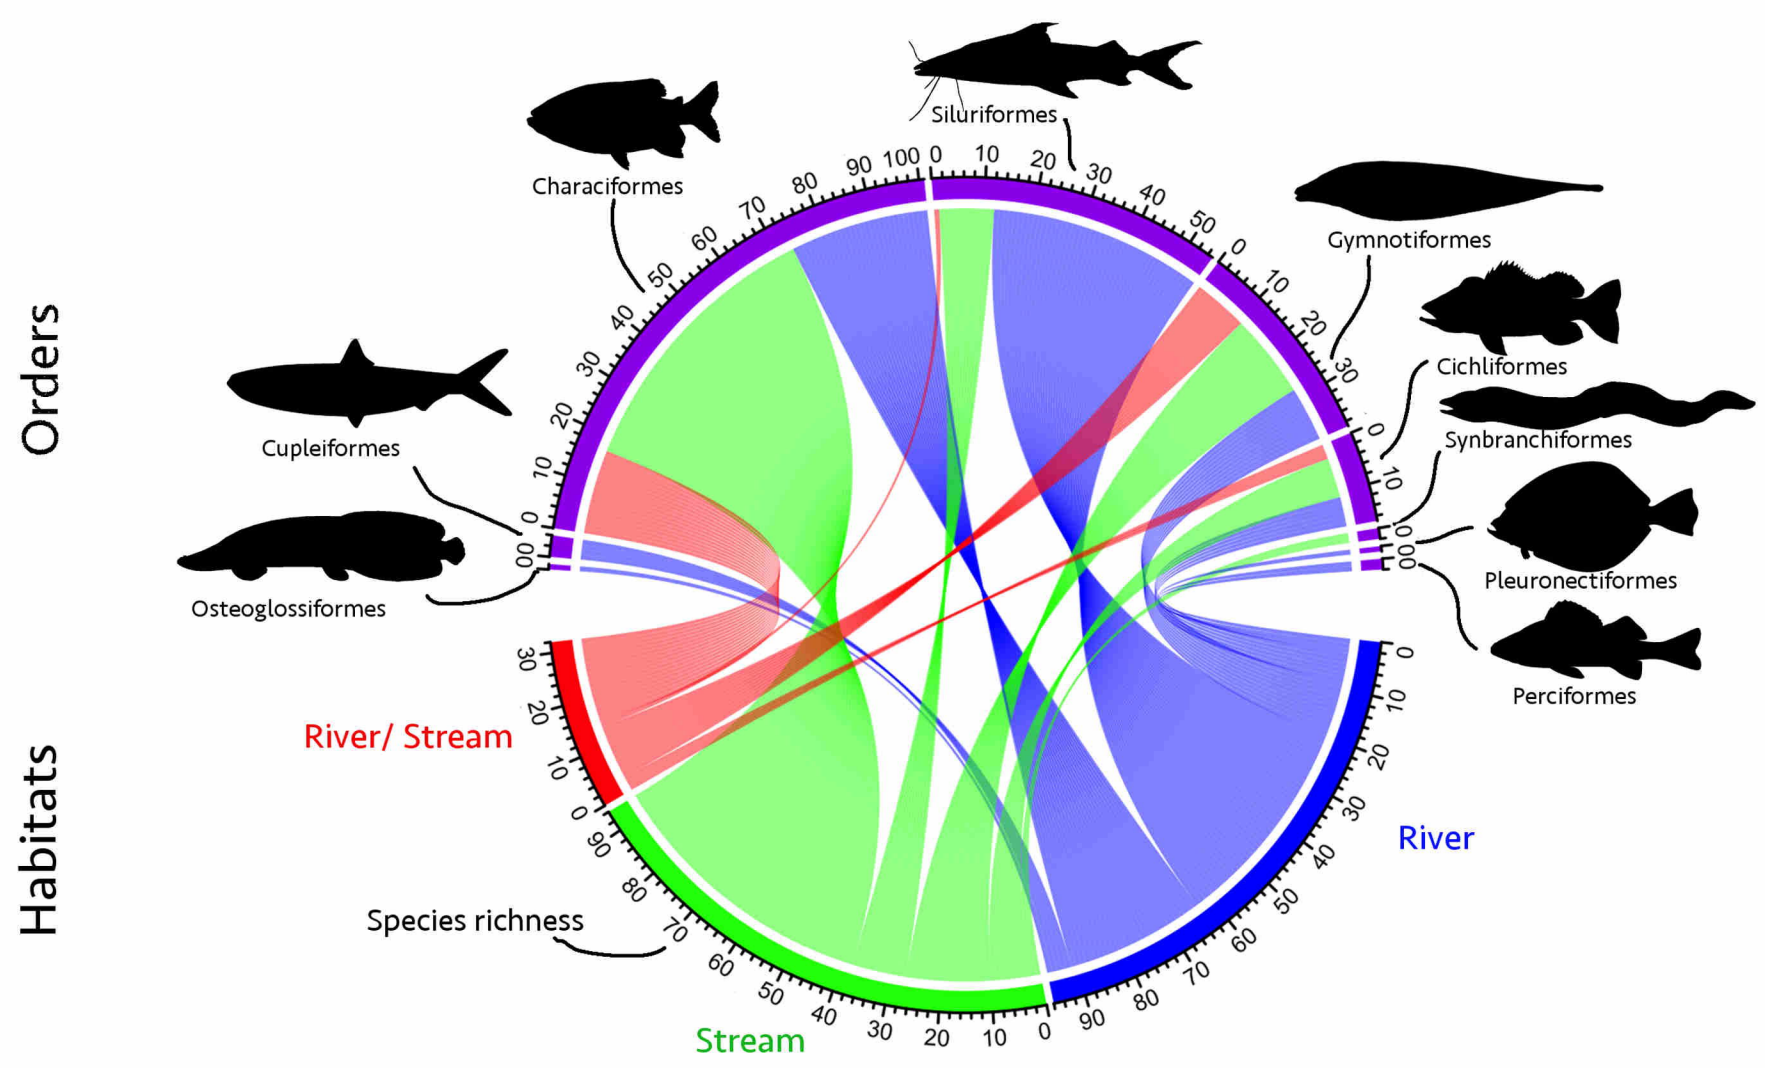

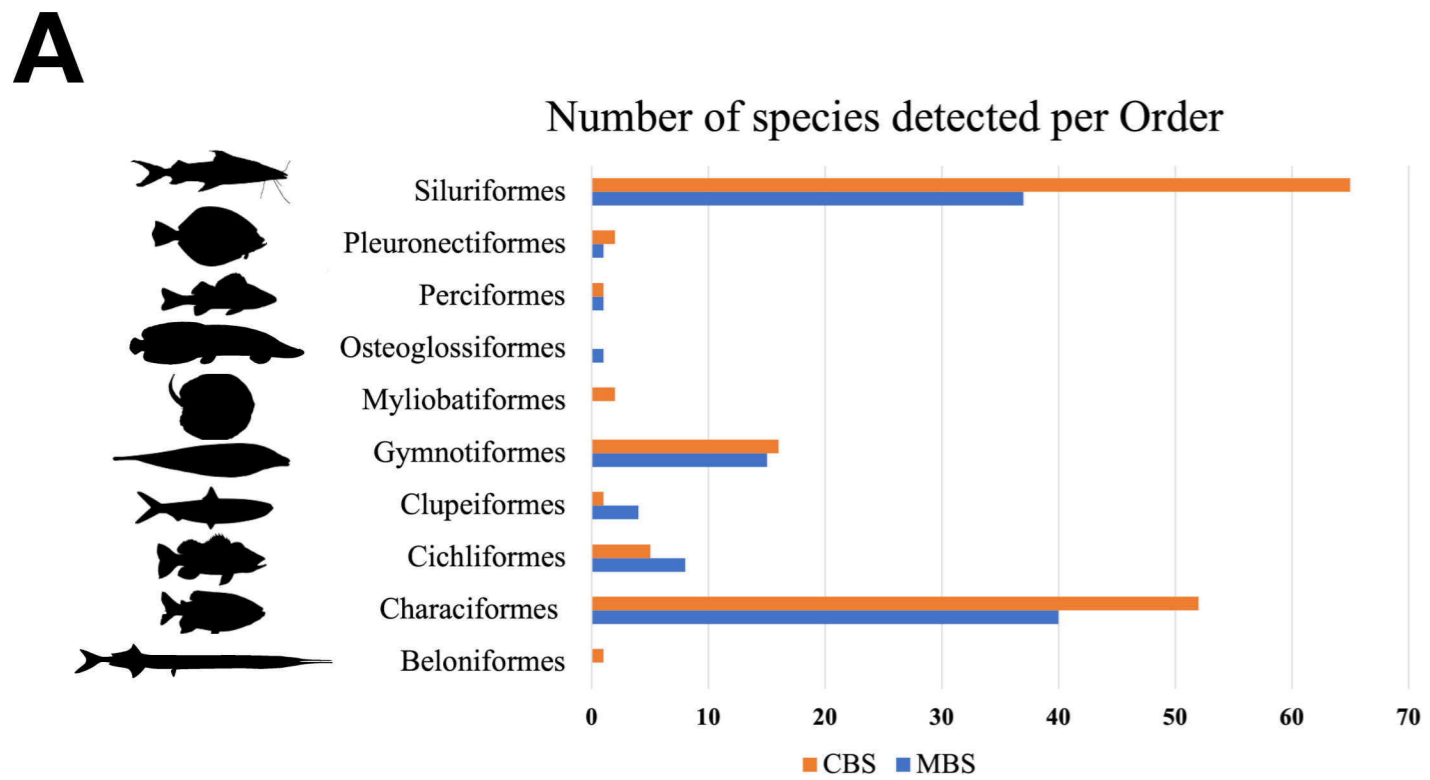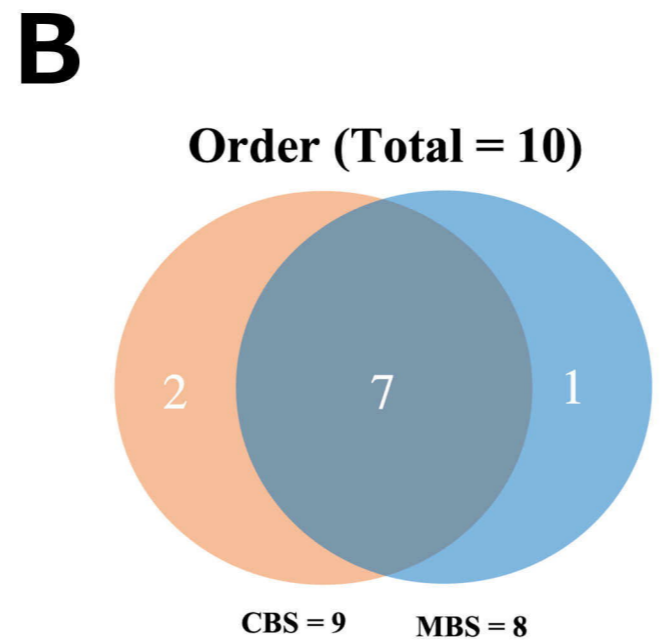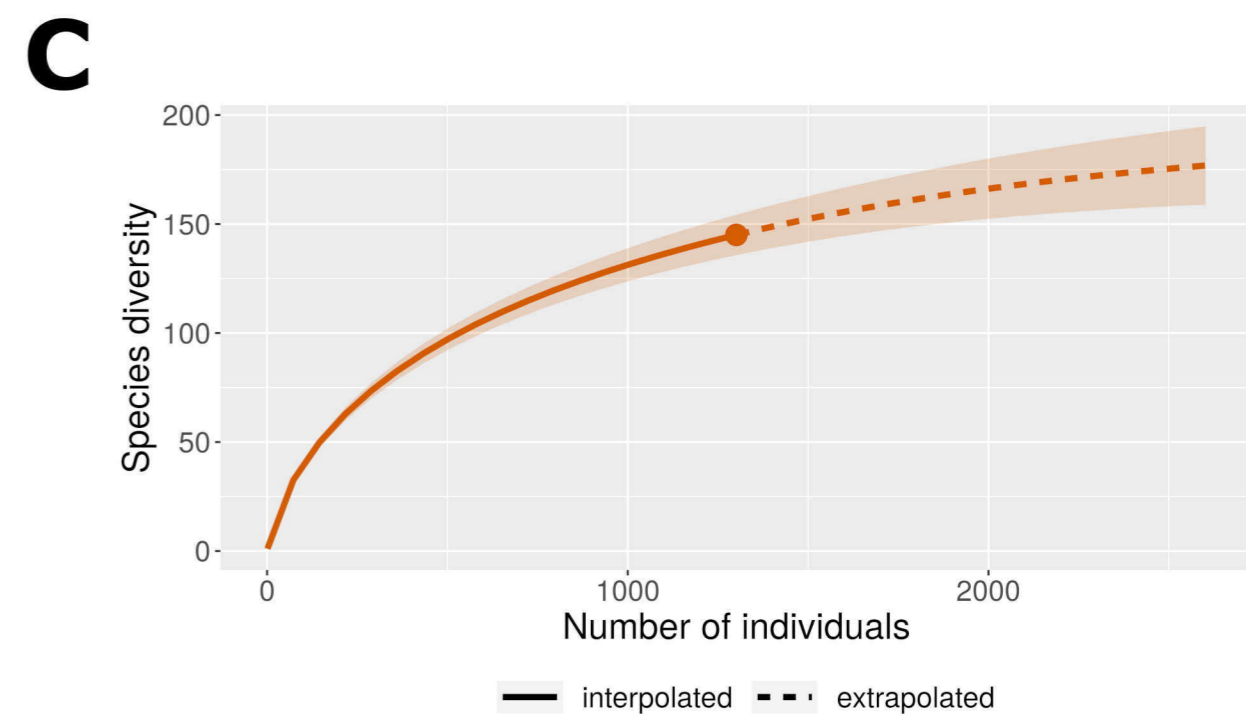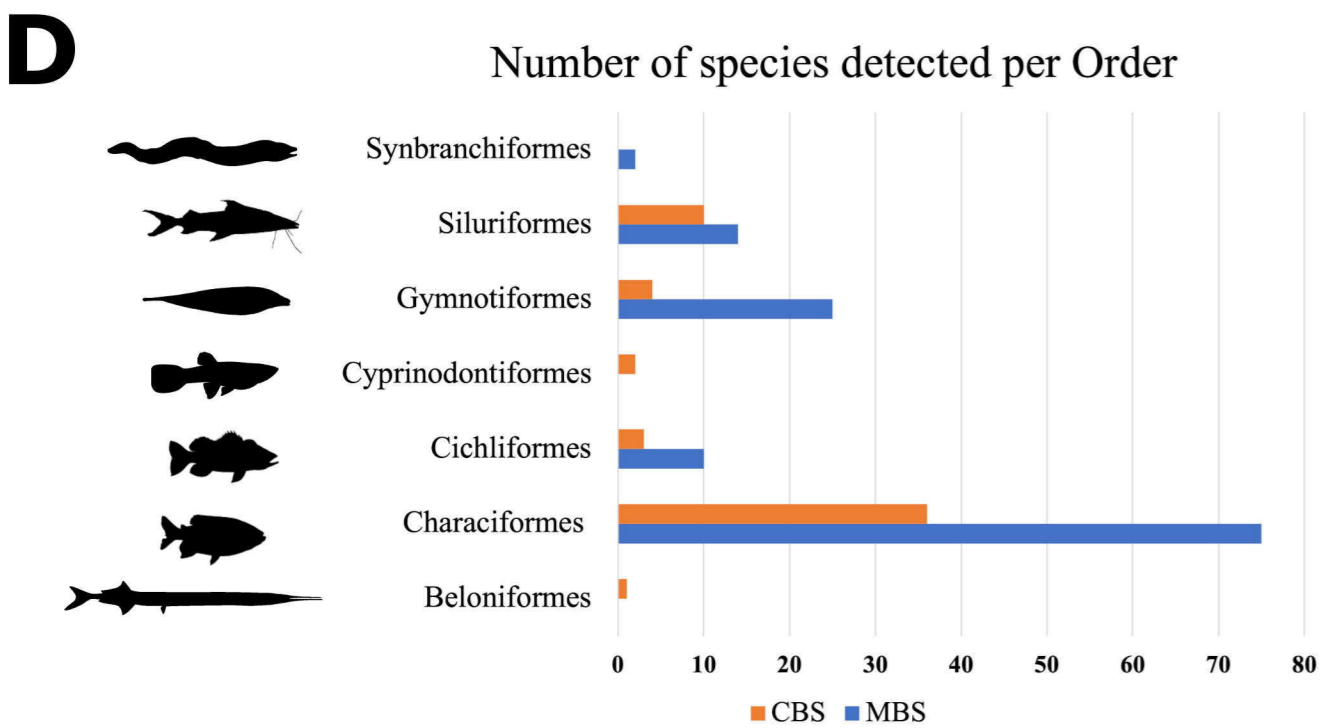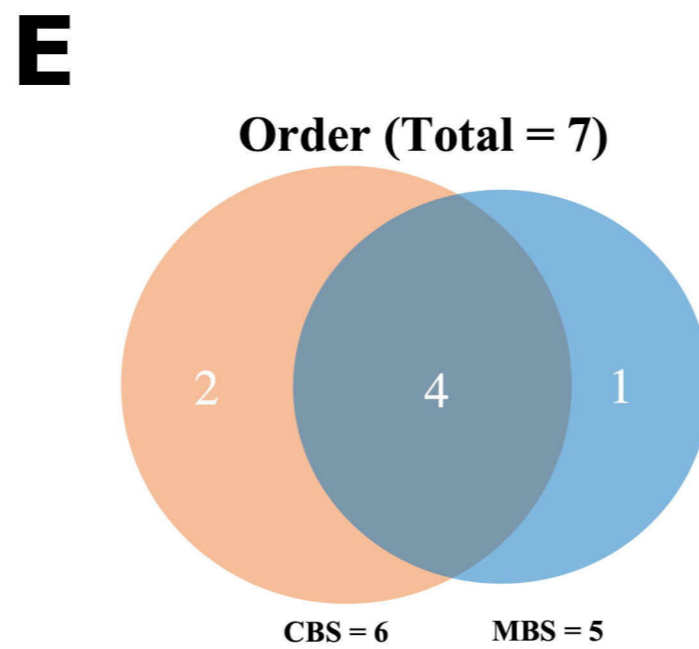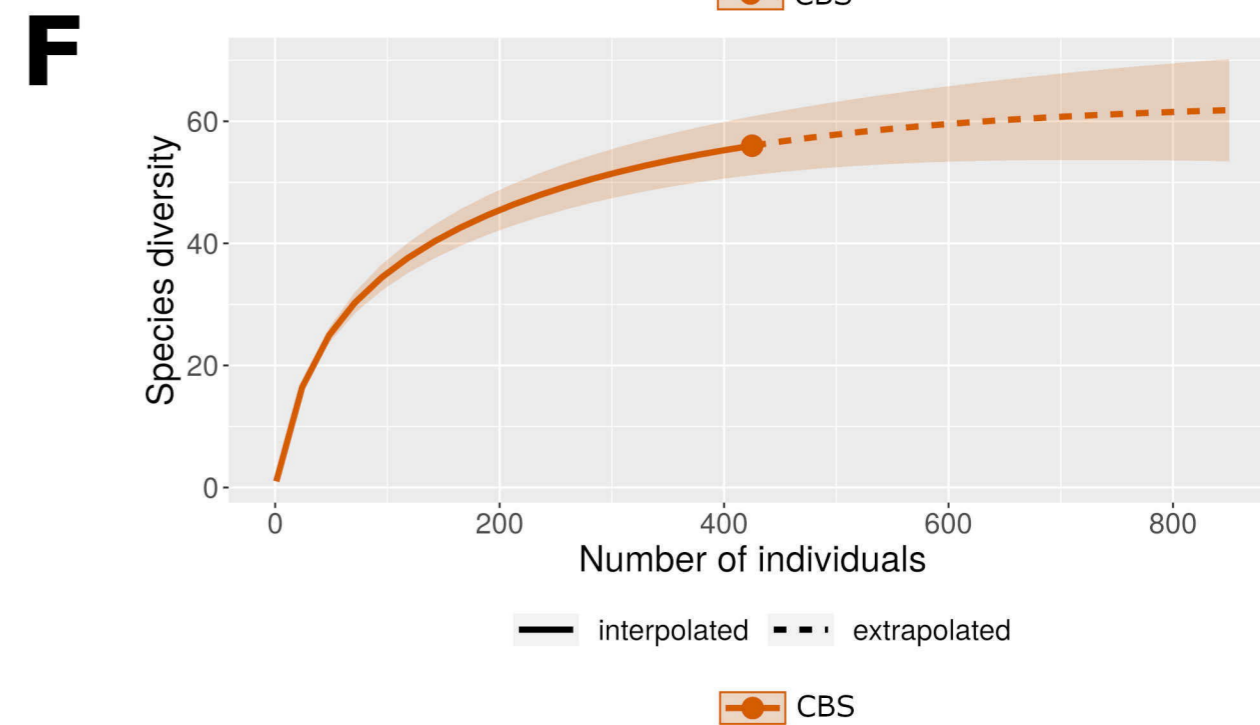

| Order             | Family            | Species                            | Read abundance | Frequency | CBS             | Station |
|-------------------|-------------------|------------------------------------|----------------|-----------|-----------------|---------|
| Osteoglossiformes | Arapaimidae       | <i>Arapaima gigas</i>              | 7,050          | 4         |                 |         |
| Clupeiformes      | Engraulidae       | <i>Anchoviella</i> sp. 1           | 18,117         | 4         | INPA-ICT 055766 | S1      |
| Characiformes     | Crenuchidae       | <i>Characidium</i> sp. 1           | 69             | 2         |                 |         |
| Characiformes     | Erythrinidae      | <i>Hoplerythrinus unitaeniatus</i> | 1,332          | 5         |                 |         |
| Characiformes     | Erythrinidae      | <i>Hoplías malabaricus</i>         | 324            | 2         | INPA-ICT 055204 | S2      |
| Characiformes     | Cynodontidae      | <i>Cynodon meionactis</i>          | 1,769          | 1         |                 |         |
| Characiformes     | Cynodontidae      | <i>Hydrolycus scomberoides</i>     | 9,118          | 4         |                 |         |
| Characiformes     | Serrasalminidae   | <i>Serrasalmus eigenmanni</i>      | 1,222          | 2         |                 |         |
| Characiformes     | Hemiodontidae     | <i>Anodus</i> sp.                  | 4,483          | 3         |                 |         |
| Characiformes     | Anostomidae       | <i>Abramites hypselonotus</i>      | 1,304          | 1         |                 |         |
| Characiformes     | Anostomidae       | <i>Leporinus apollo</i>            | 846            | 3         |                 |         |
| Characiformes     | Anostomidae       | <i>Leporinus fasciatus</i>         | 31             | 1         |                 |         |
| Characiformes     | Anostomidae       | <i>Scheizodon knerii</i>           | 46,775         | 6         |                 |         |
| Characiformes     | Chilodontidae     | <i>Caenotropus labyrinthicus</i>   | 14             | 1         | INPA-ICT 055404 | S2      |
| Characiformes     | Curimatidae       | <i>Potamorhina</i> sp.             | 18,470         | 3         |                 |         |
| Characiformes     | Prochilodontidae  | <i>Prochilodus harttii</i>         | 90,591         | 6         |                 |         |
| Characiformes     | Prochilodontidae  | <i>Semaprochilodus</i> sp. 1       | 15,460         | 5         |                 |         |
| Characiformes     | Acestrorhynchidae | <i>Acestrorhynchus falcatus</i>    | 11,546         | 5         | INPA-ICT 055991 | S2      |
| Characiformes     | Chalceidae        | <i>Chalceus erythrurus</i>         | 8,741          | 5         | INPA-ICT 055360 | S1, S2  |
| Characiformes     | Chalceidae        | <i>Chalceus macrolepidotus</i>     | 4,158          | 2         |                 |         |
| Characiformes     | Characidae        | <i>Charax pauciradiatus</i>        | 10,186         | 5         |                 |         |
| Characiformes     | Characidae        | <i>Charax</i> sp. 1                | 32             | 1         |                 |         |
| Characiformes     | Characidae        | <i>Ctenobrycon hauxwellianus</i>   | 491            | 3         |                 |         |
| Characiformes     | Characidae        | <i>Jupiaba ocellata</i>            | 1,150          | 4         |                 |         |
| Characiformes     | Characidae        | <i>Moenkhausia lepidura</i>        | 782            | 3         |                 |         |
| Characiformes     | Serrasalminidae   | <i>Myloplus rubripinnis</i>        | 232            | 4         |                 |         |
| Characiformes     | Serrasalminidae   | <i>Pygocentrus nattereri</i>       | 19,766         | 9         | INPA-ICT 055811 | S1, S2  |
| Characiformes     | Iguanodectidae    | <i>Bryconops affinis</i>           | 9,344          | 5         |                 |         |



|               |               |                                      |        |   |                 |               |
|---------------|---------------|--------------------------------------|--------|---|-----------------|---------------|
| Characiformes | Triportheidae | <i>Triportheus</i> sp. 1             | 232    | 3 |                 |               |
| Siluriformes  | Loricariidae  | <i>Dekeyseria amazonica</i>          | 86     | 1 | INPA-ICT 055419 | S1            |
| Siluriformes  | Loricariidae  | <i>Hypostomus plecostomus</i>        | 113    | 1 |                 |               |
| Siluriformes  | Loricariidae  | <i>Lasiancistrus saetiger</i>        | 1,837  | 1 |                 |               |
| Siluriformes  | Doradidae     | <i>Hemidoras morrisi</i>             | 14     | 1 | INPA-ICT 055422 | S1            |
| Siluriformes  | Doradidae     | <i>Liosomadoras morrowi</i>          | 25     | 1 |                 |               |
| Siluriformes  | Doradidae     | <i>Megalodoras uranoscopus</i>       | 9      | 1 | INPA-ICT 055491 | S1            |
| Siluriformes  | Doradidae     | <i>Platydoras costatus</i>           | 40     | 2 |                 |               |
| Siluriformes  | Doradidae     | <i>Pterodoras granulatus</i>         | 94     | 1 | INPA-ICT 055463 | S1            |
| Siluriformes  | Doradidae     | <i>Trachydoras nattereri</i>         | 34     | 1 | INPA-ICT 055660 | S3            |
| Siluriformes  | Pimelodidae   | <i>Hypophthalmus edentatus</i>       | 472    | 2 |                 |               |
| Siluriformes  | Heptapteridae | <i>Pimelodella cristata</i>          | 1,359  | 7 |                 |               |
| Siluriformes  | Pimelodidae   | <i>Pseudoplatystoma eticulatum</i>   | 2,064  | 6 |                 |               |
| Siluriformes  | Pimelodidae   | <i>Pinirampus pinirampu</i>          | 4      | 1 | INPA-ICT 055316 | S1            |
| Siluriformes  | Pimelodidae   | <i>Pseudoplatystoma tigrinum</i>     | 183    | 2 | INPA-ICT 055379 | S1            |
| Siluriformes  | Pimelodidae   | <i>Hemisorubim platyrhynchos</i>     | 110    | 1 |                 |               |
| Siluriformes  | Pimelodidae   | <i>Brachyplatystoma vaillantii</i>   | 25     | 1 |                 |               |
| Siluriformes  | Pimelodidae   | <i>Sorubimichthys planiceps</i>      | 431    | 1 |                 |               |
| Siluriformes  | Pimelodidae   | <i>Sorubim elongatus</i>             | 282    | 1 |                 |               |
| Siluriformes  | Pimelodidae   | <i>Phractocephalus hemiliopterus</i> | 316    | 4 |                 |               |
| Siluriformes  | Pimelodidae   | <i>Zungaro jahu</i>                  | 31     | 1 |                 |               |
| Gymnotiformes | Gymnotidae    | <i>Electrophorus varii</i>           | 1,234  | 5 |                 |               |
| Gymnotiformes | Gymnotidae    | <i>Gymnotus carapo</i>               | 121    | 1 |                 |               |
| Gymnotiformes | Sternopygidae | <i>Eigenmannia limbata</i>           | 10,443 | 7 | INPA-ICT 055420 | S1, S2,<br>S3 |
| Gymnotiformes | Apteronotidae | <i>Apteronotus albifrons</i>         | 567    | 5 |                 |               |
| Characiformes | Ctenoluciidae | <i>Boulengerella maculata</i>        | 126    | 1 | INPA-ICT 055263 | S1            |
| Cichliformes  | Cichlidae     | <i>Cichla ocellaris</i>              | 52     | 1 |                 |               |
| Cichliformes  | Cichlidae     | <i>Hypselecara temporalis</i>        | 38     | 1 |                 |               |

|                   |            |                                   |        |   |                 |    |
|-------------------|------------|-----------------------------------|--------|---|-----------------|----|
| Pleuronectiformes | Achiridae  | <i>Hypoclinemus mentalis</i>      | 50,324 | 1 | INPA-ICT 055269 | S1 |
| Perciformes       | Sciaenidae | <i>Plagioscion squamosissimus</i> | 1,220  | 2 | INPA-ICT 055328 | S1 |

---
